# Supplementary material for: Moderate exercise-induced dynamics on key sepsis-associated signaling pathways in the liver
Source: Springer Nature journal article supplement (doi:10.1186/s13054-023-04551-1), 2023-07-05

Fig 4, Scanned uncropped blots

Male

Female

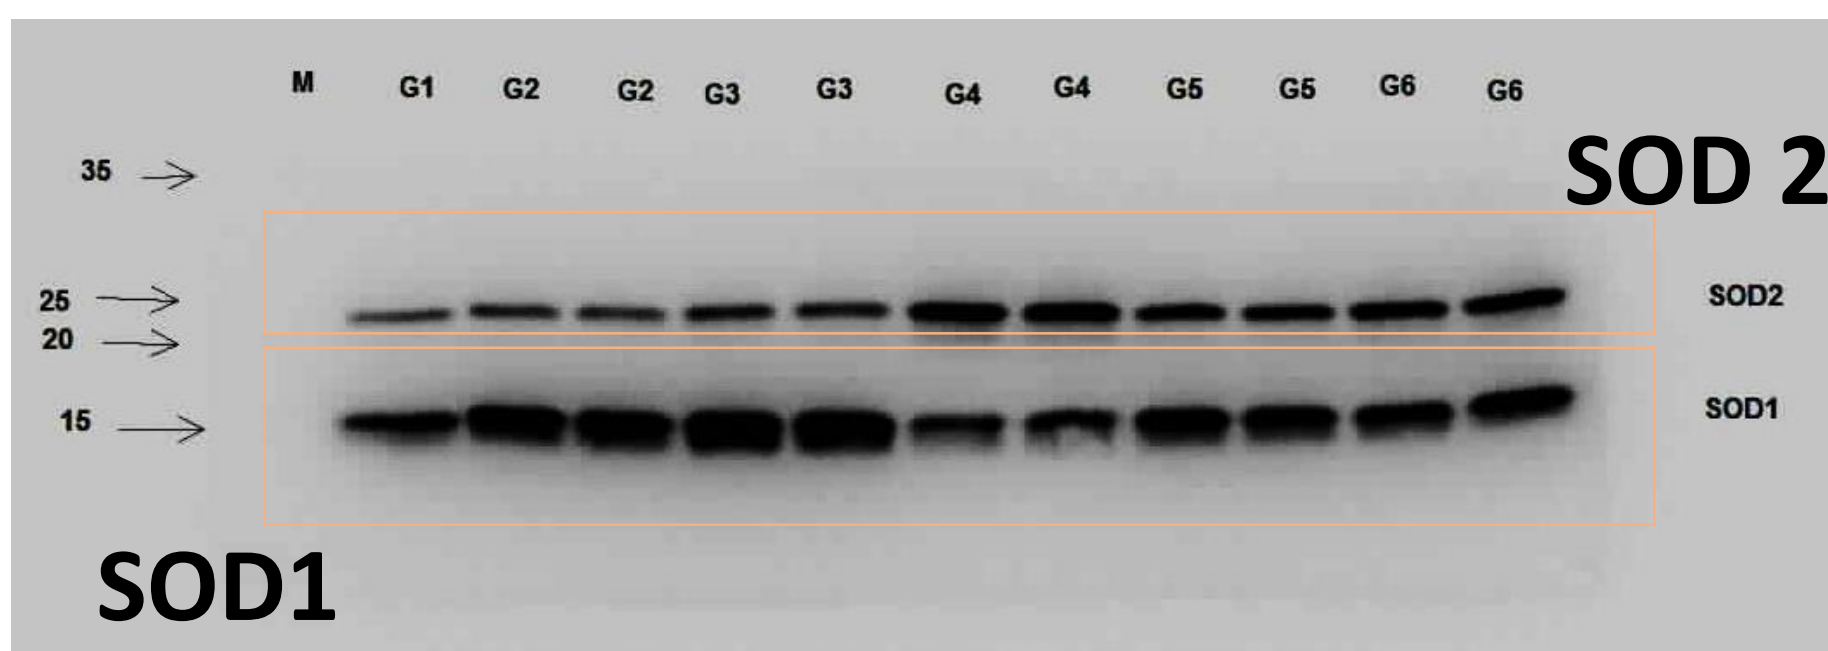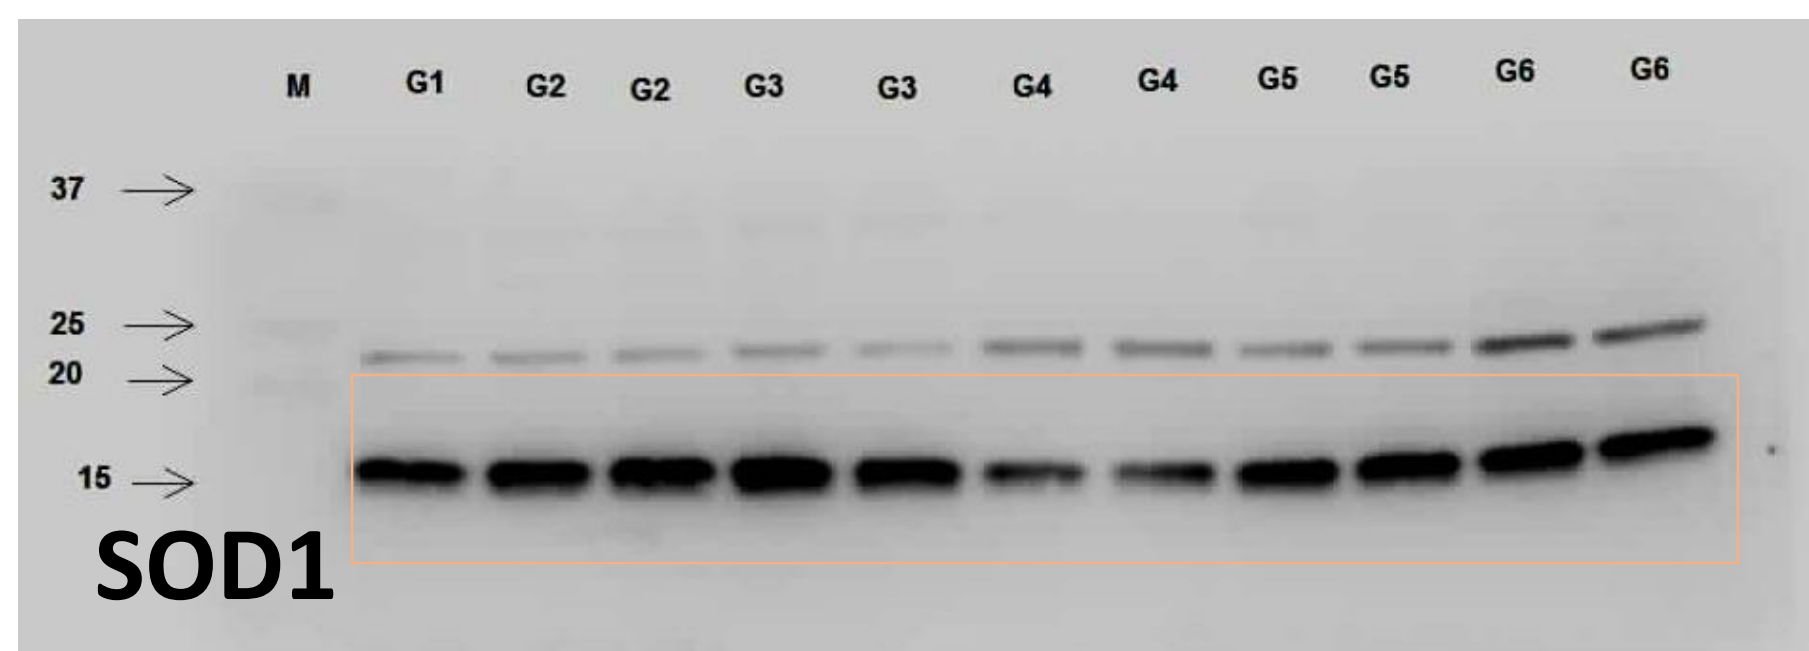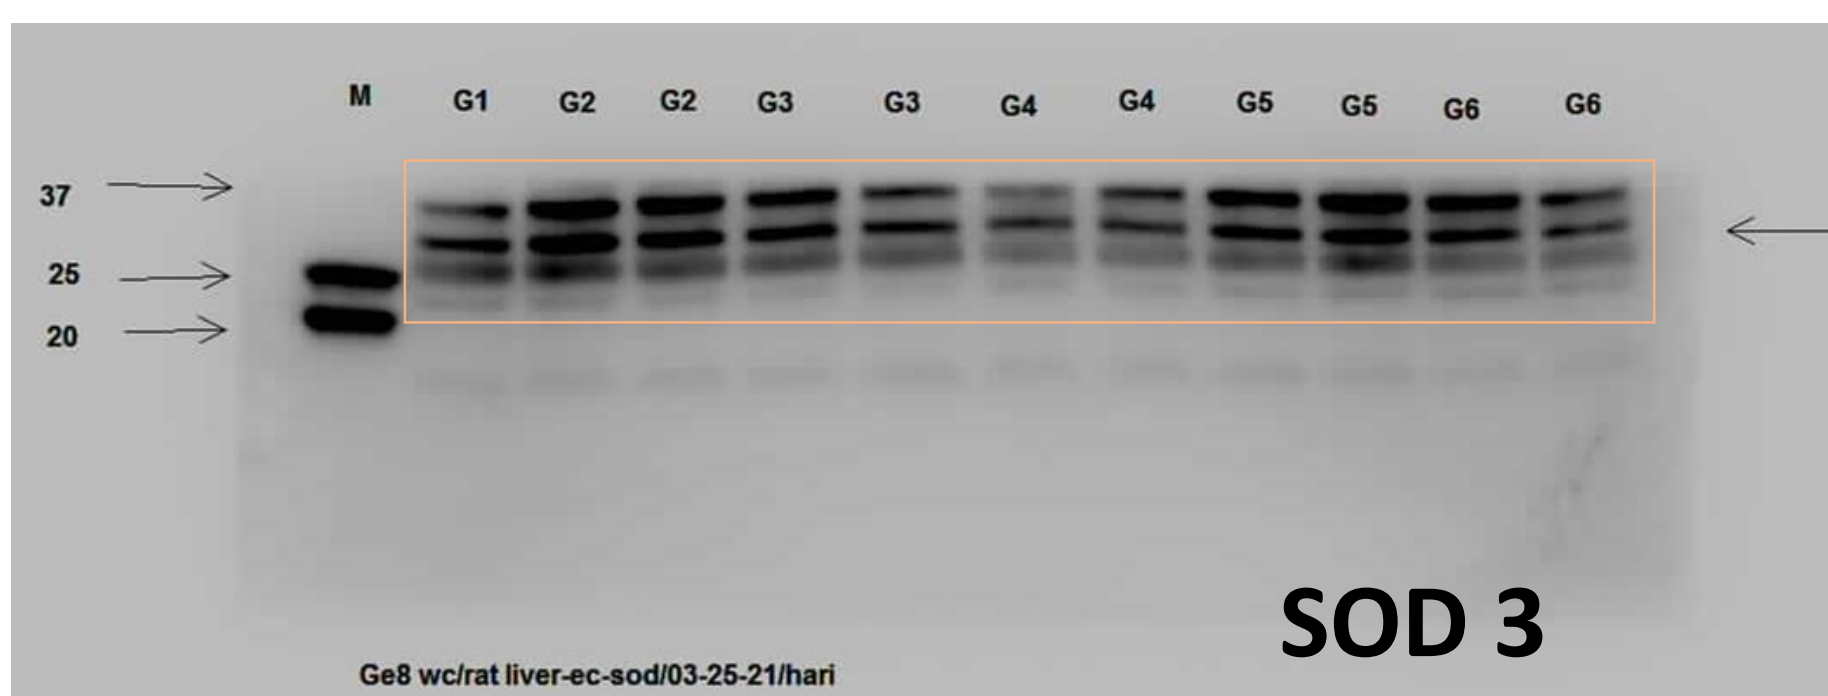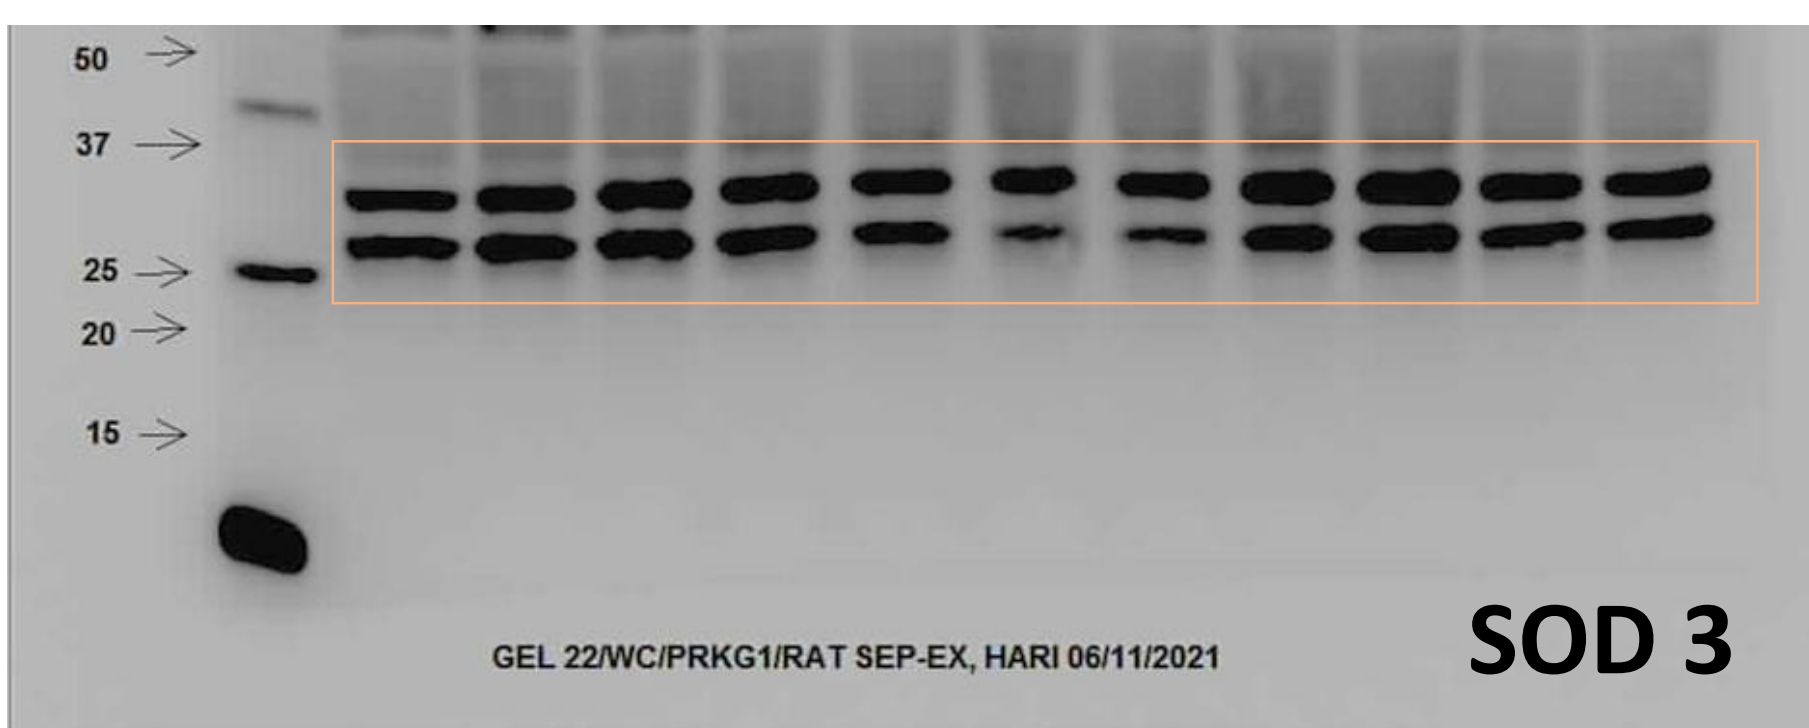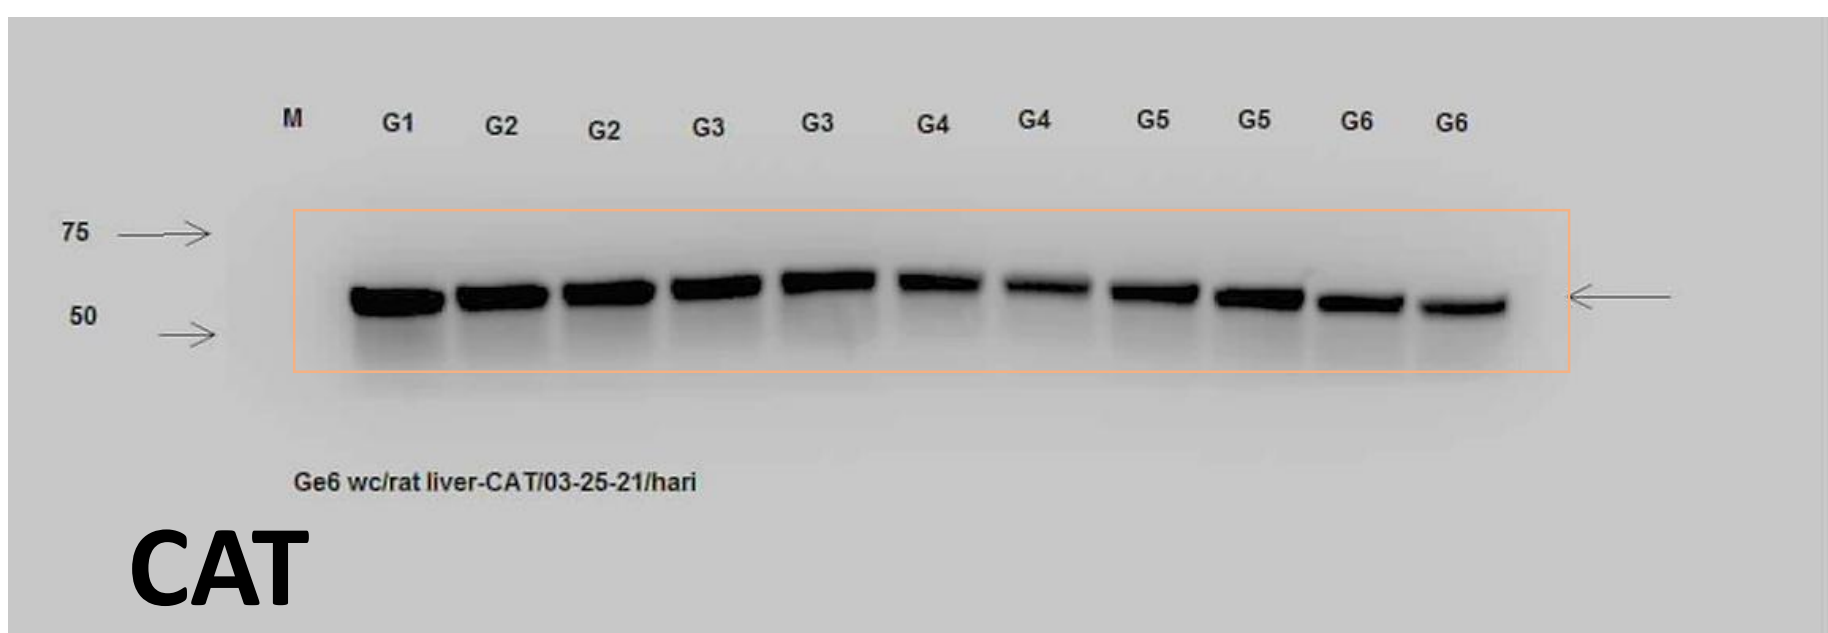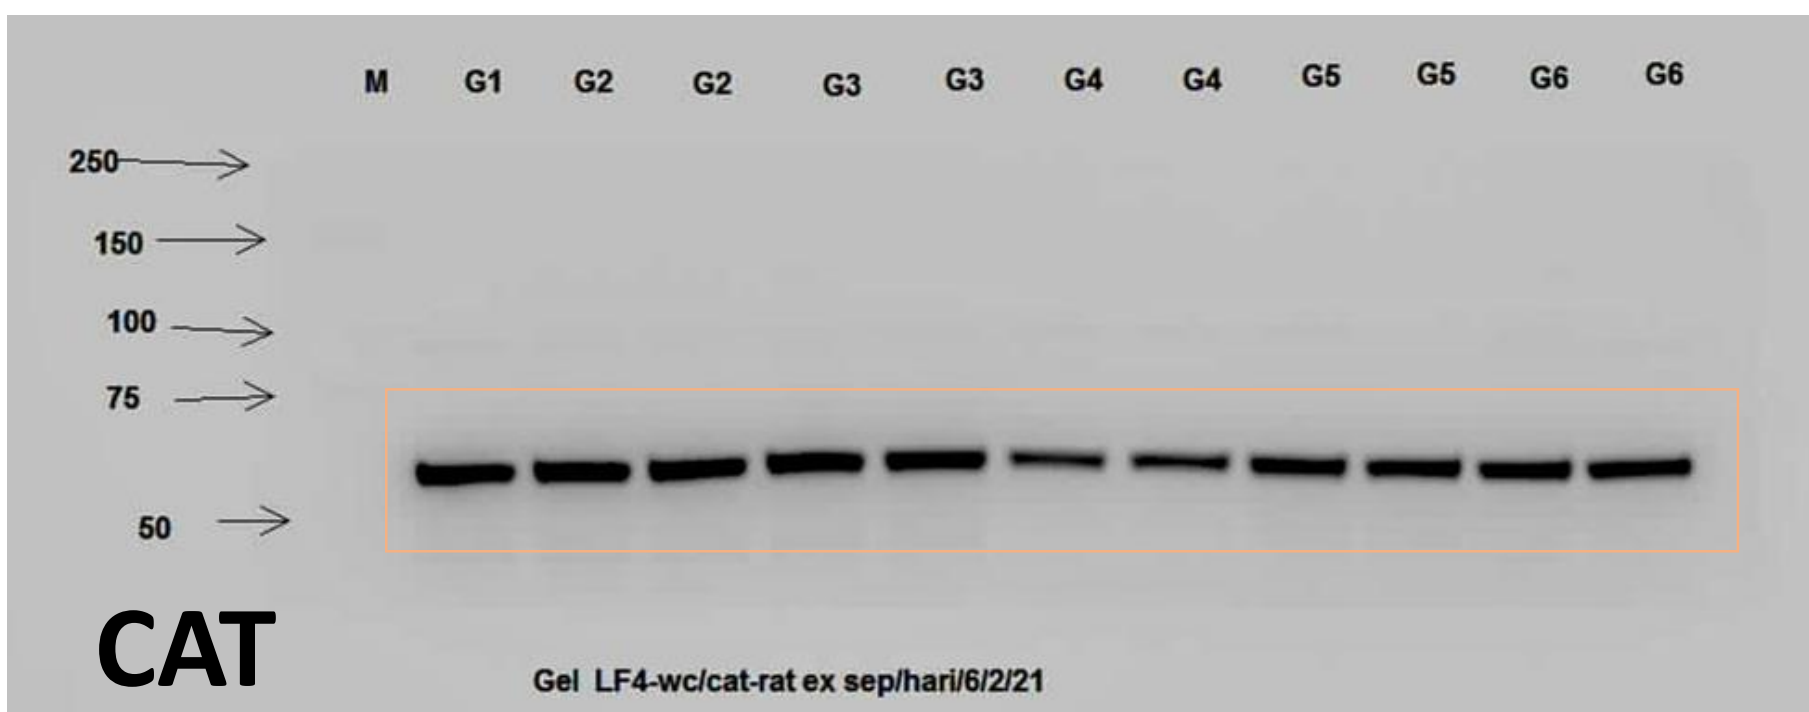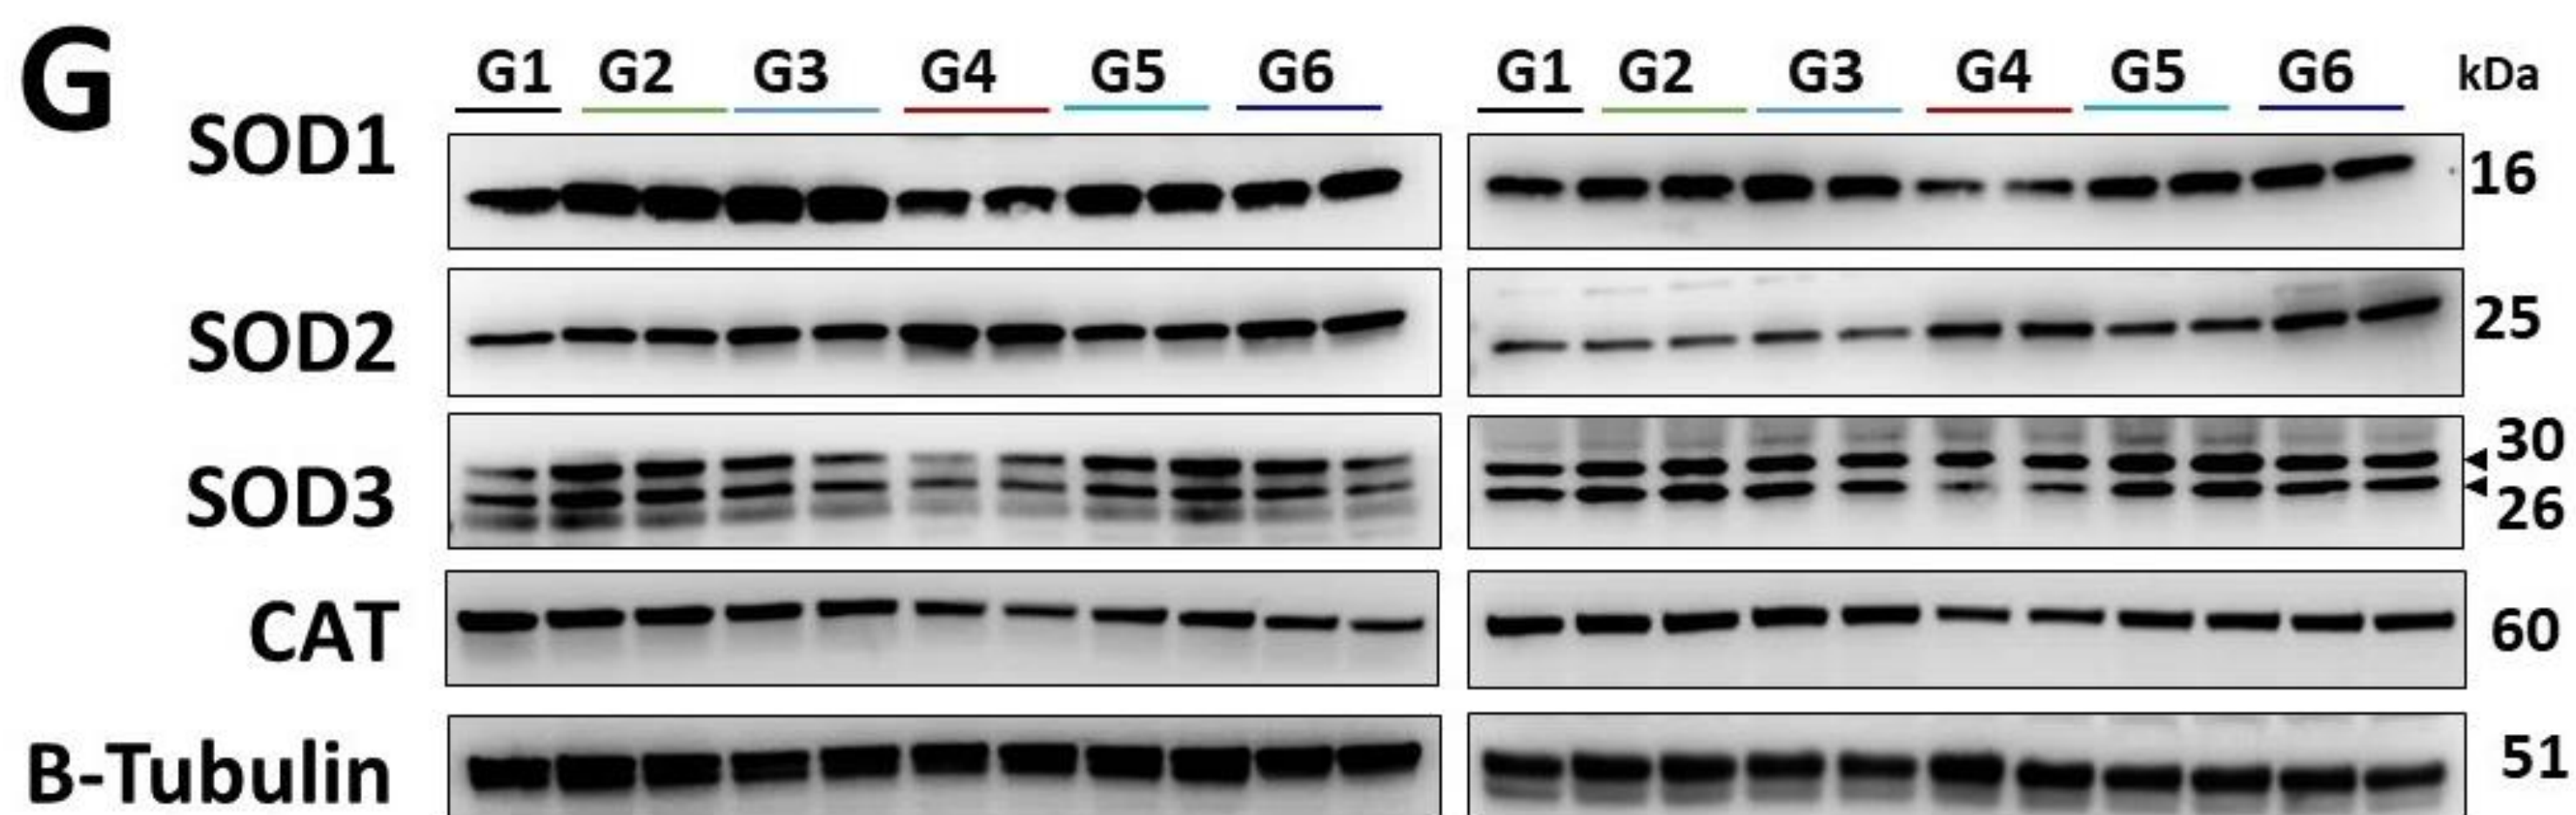

Fig 5, Scanned uncropped blots

Male

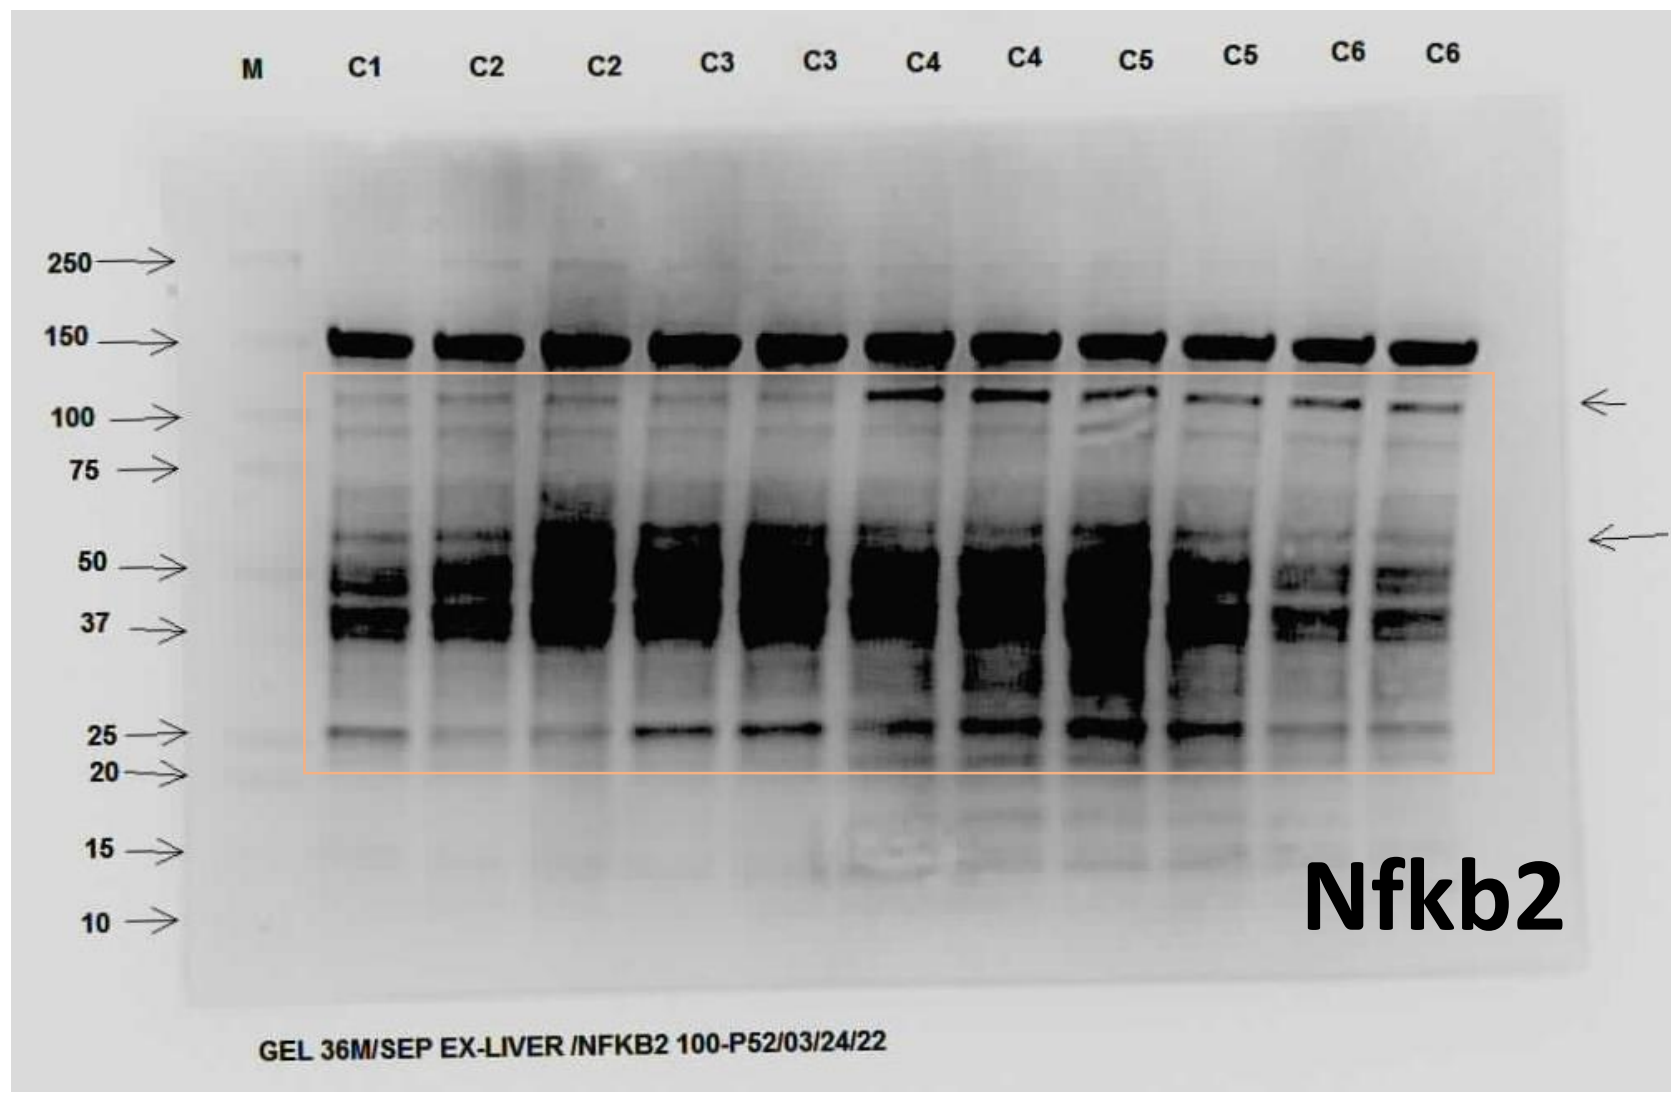

Female

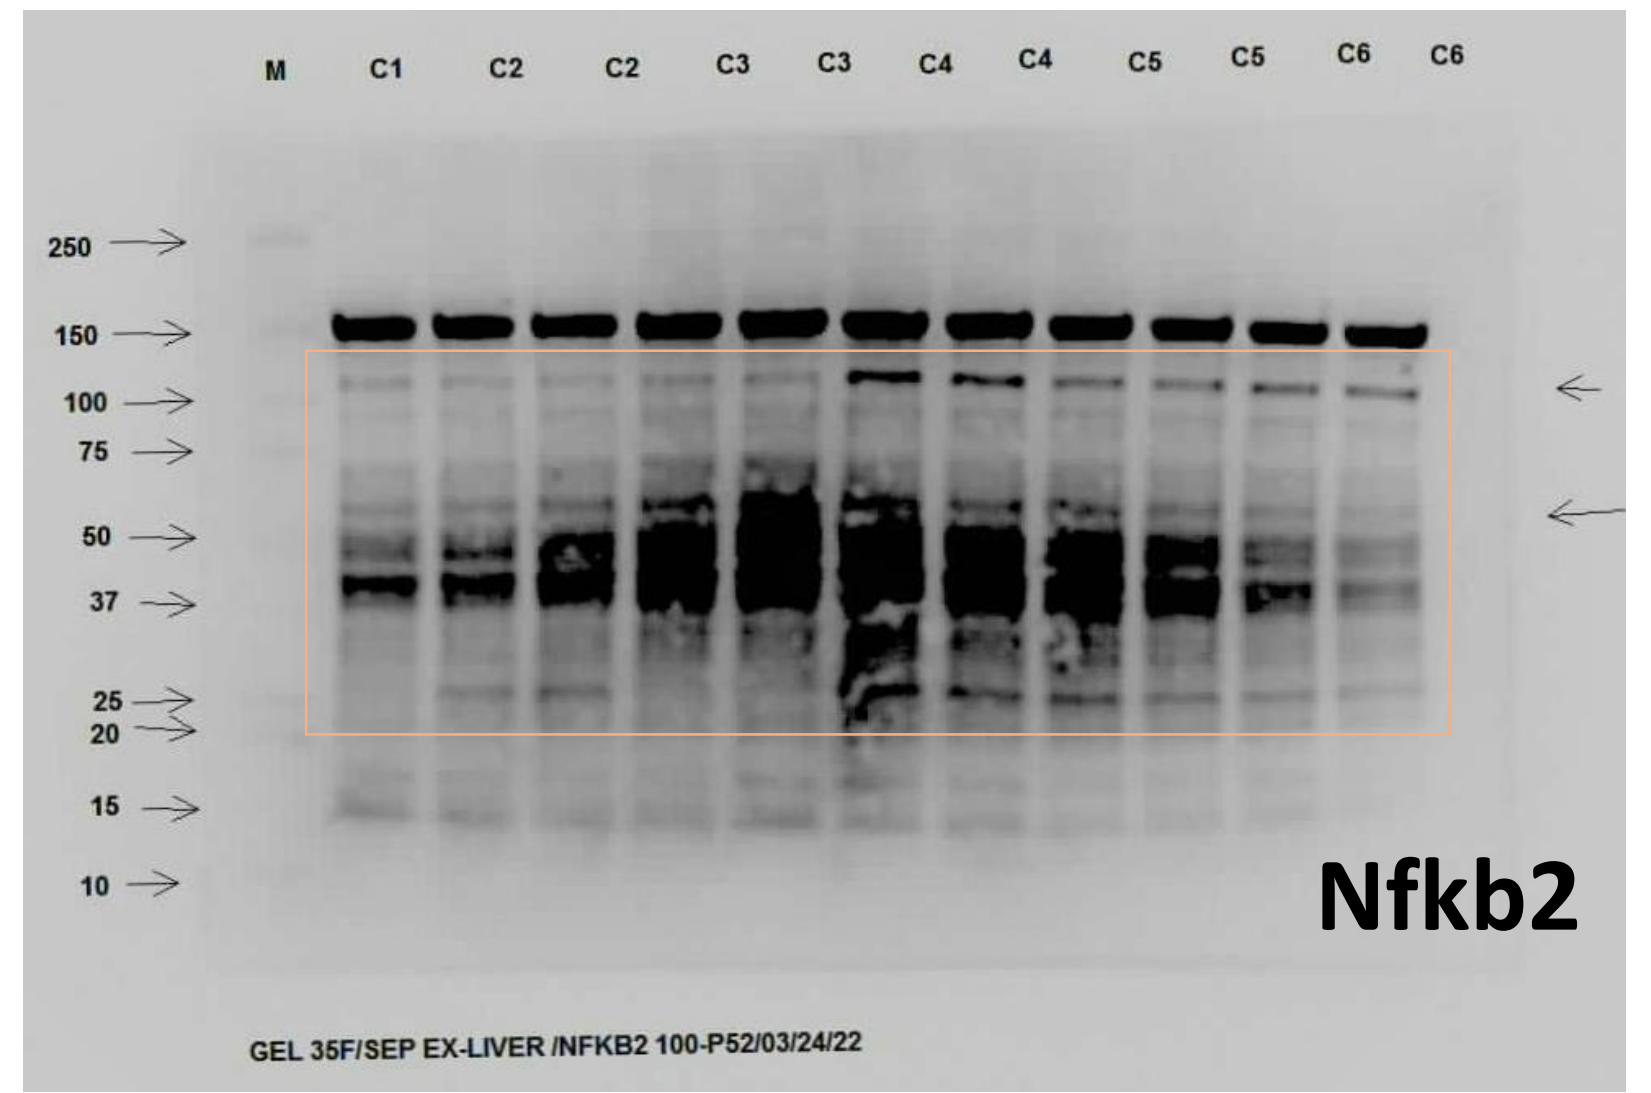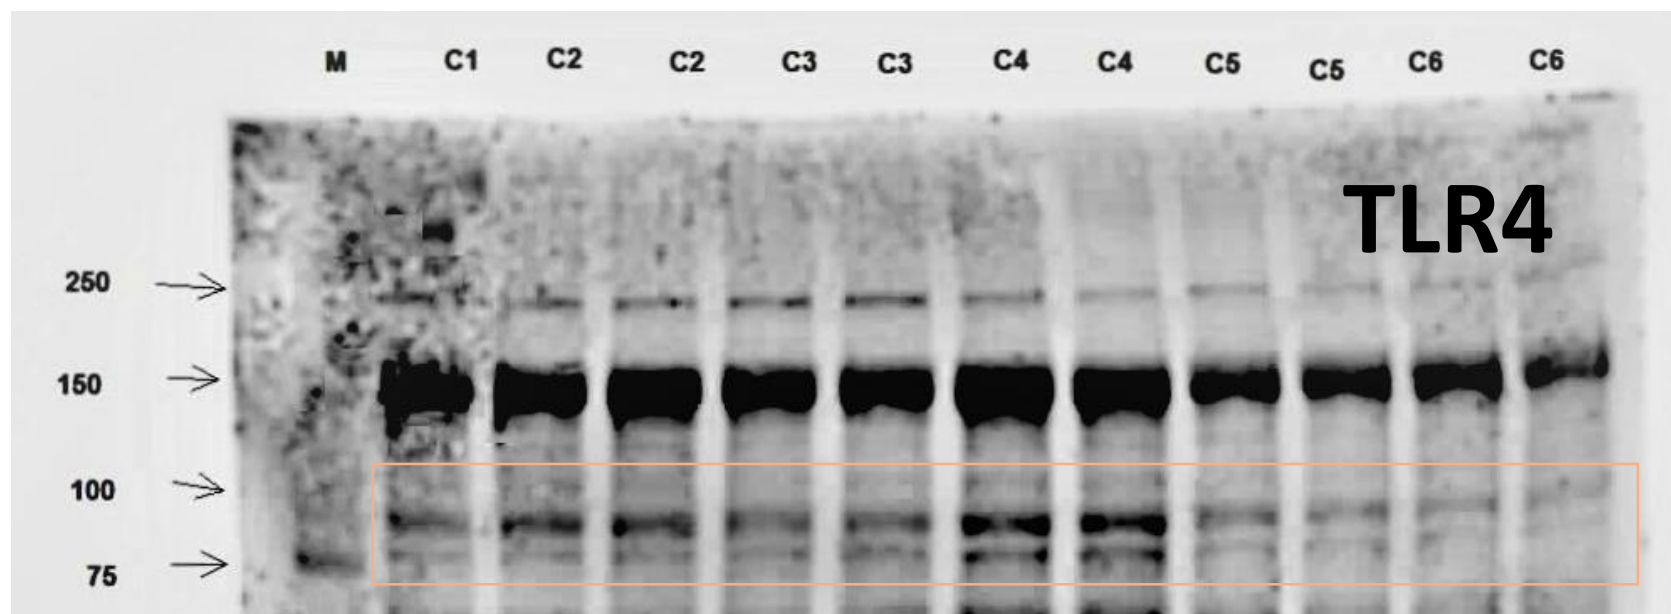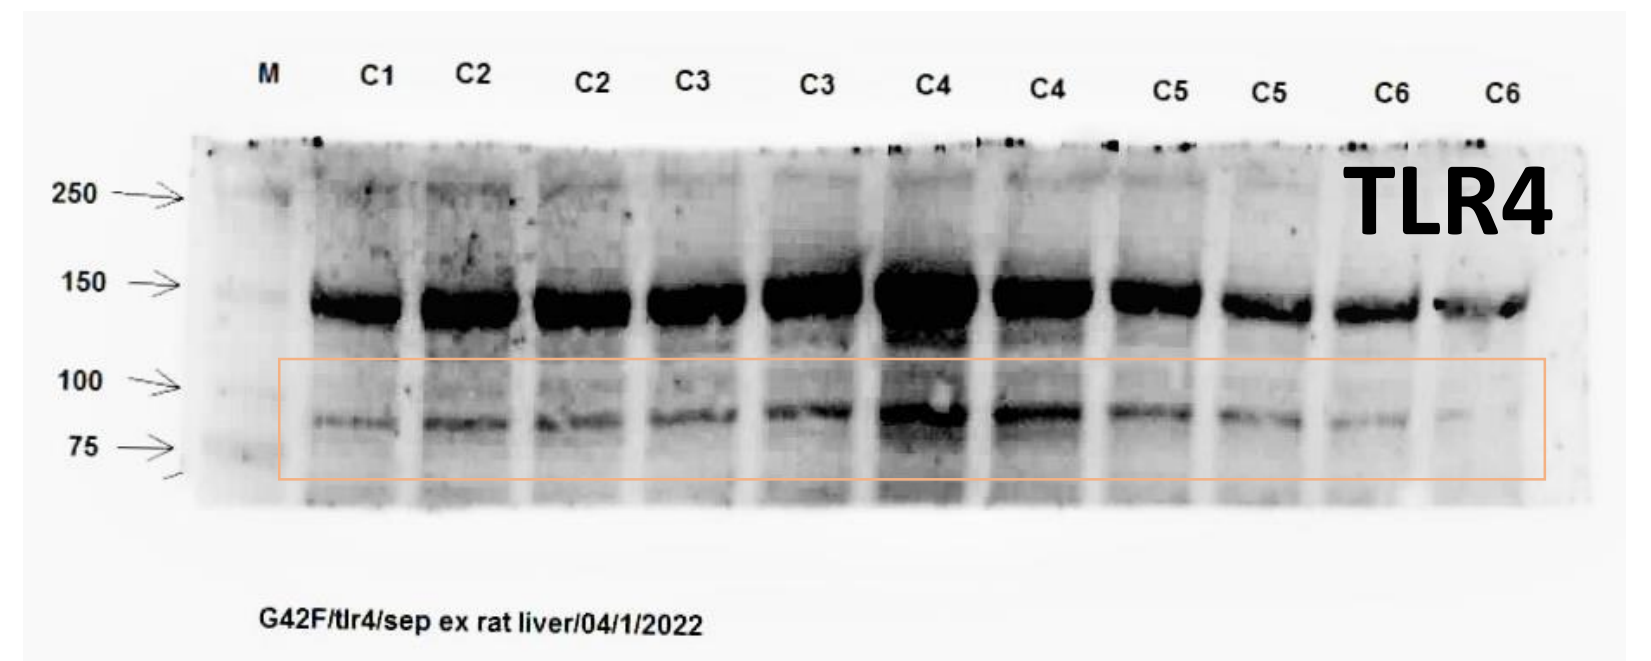

F

Male

Female

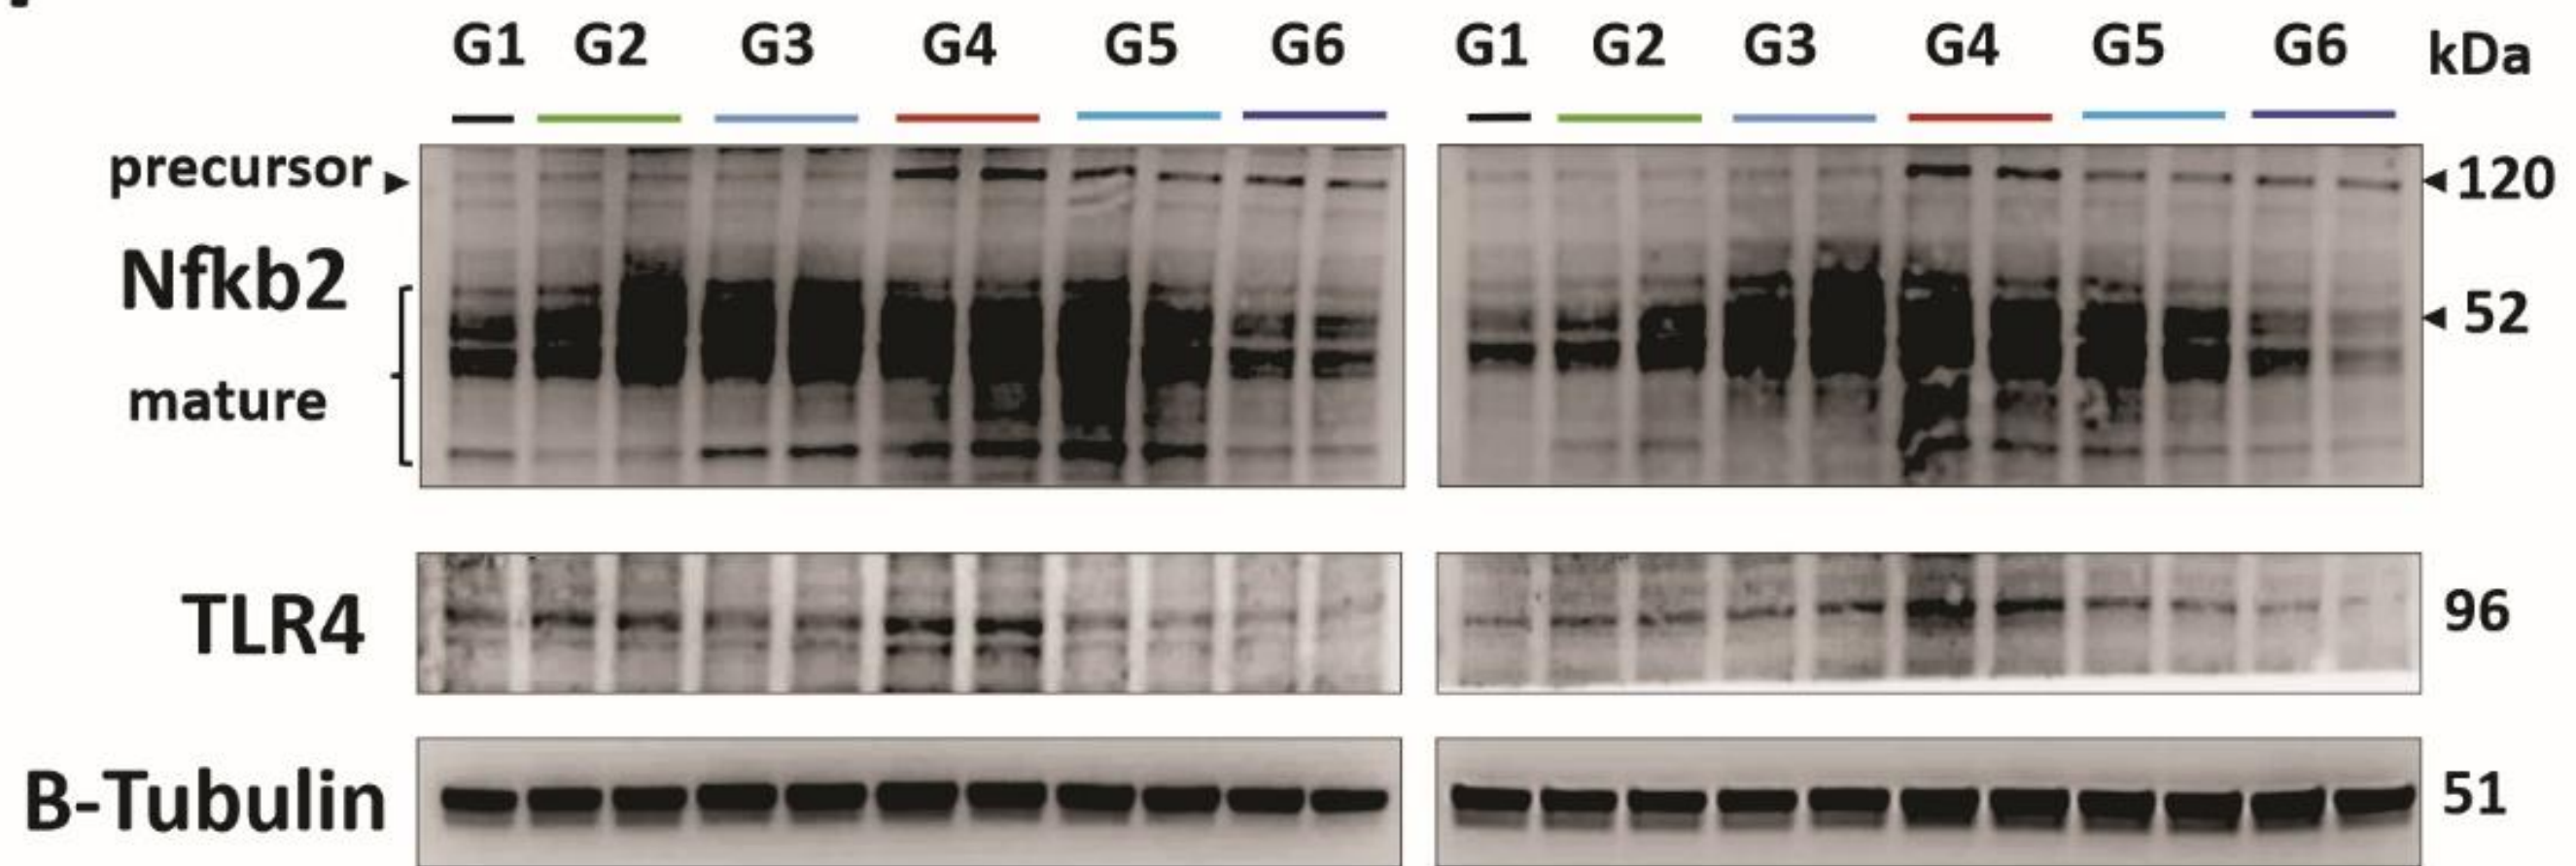





Fig 8, Scanned uncropped blots

Male

Female

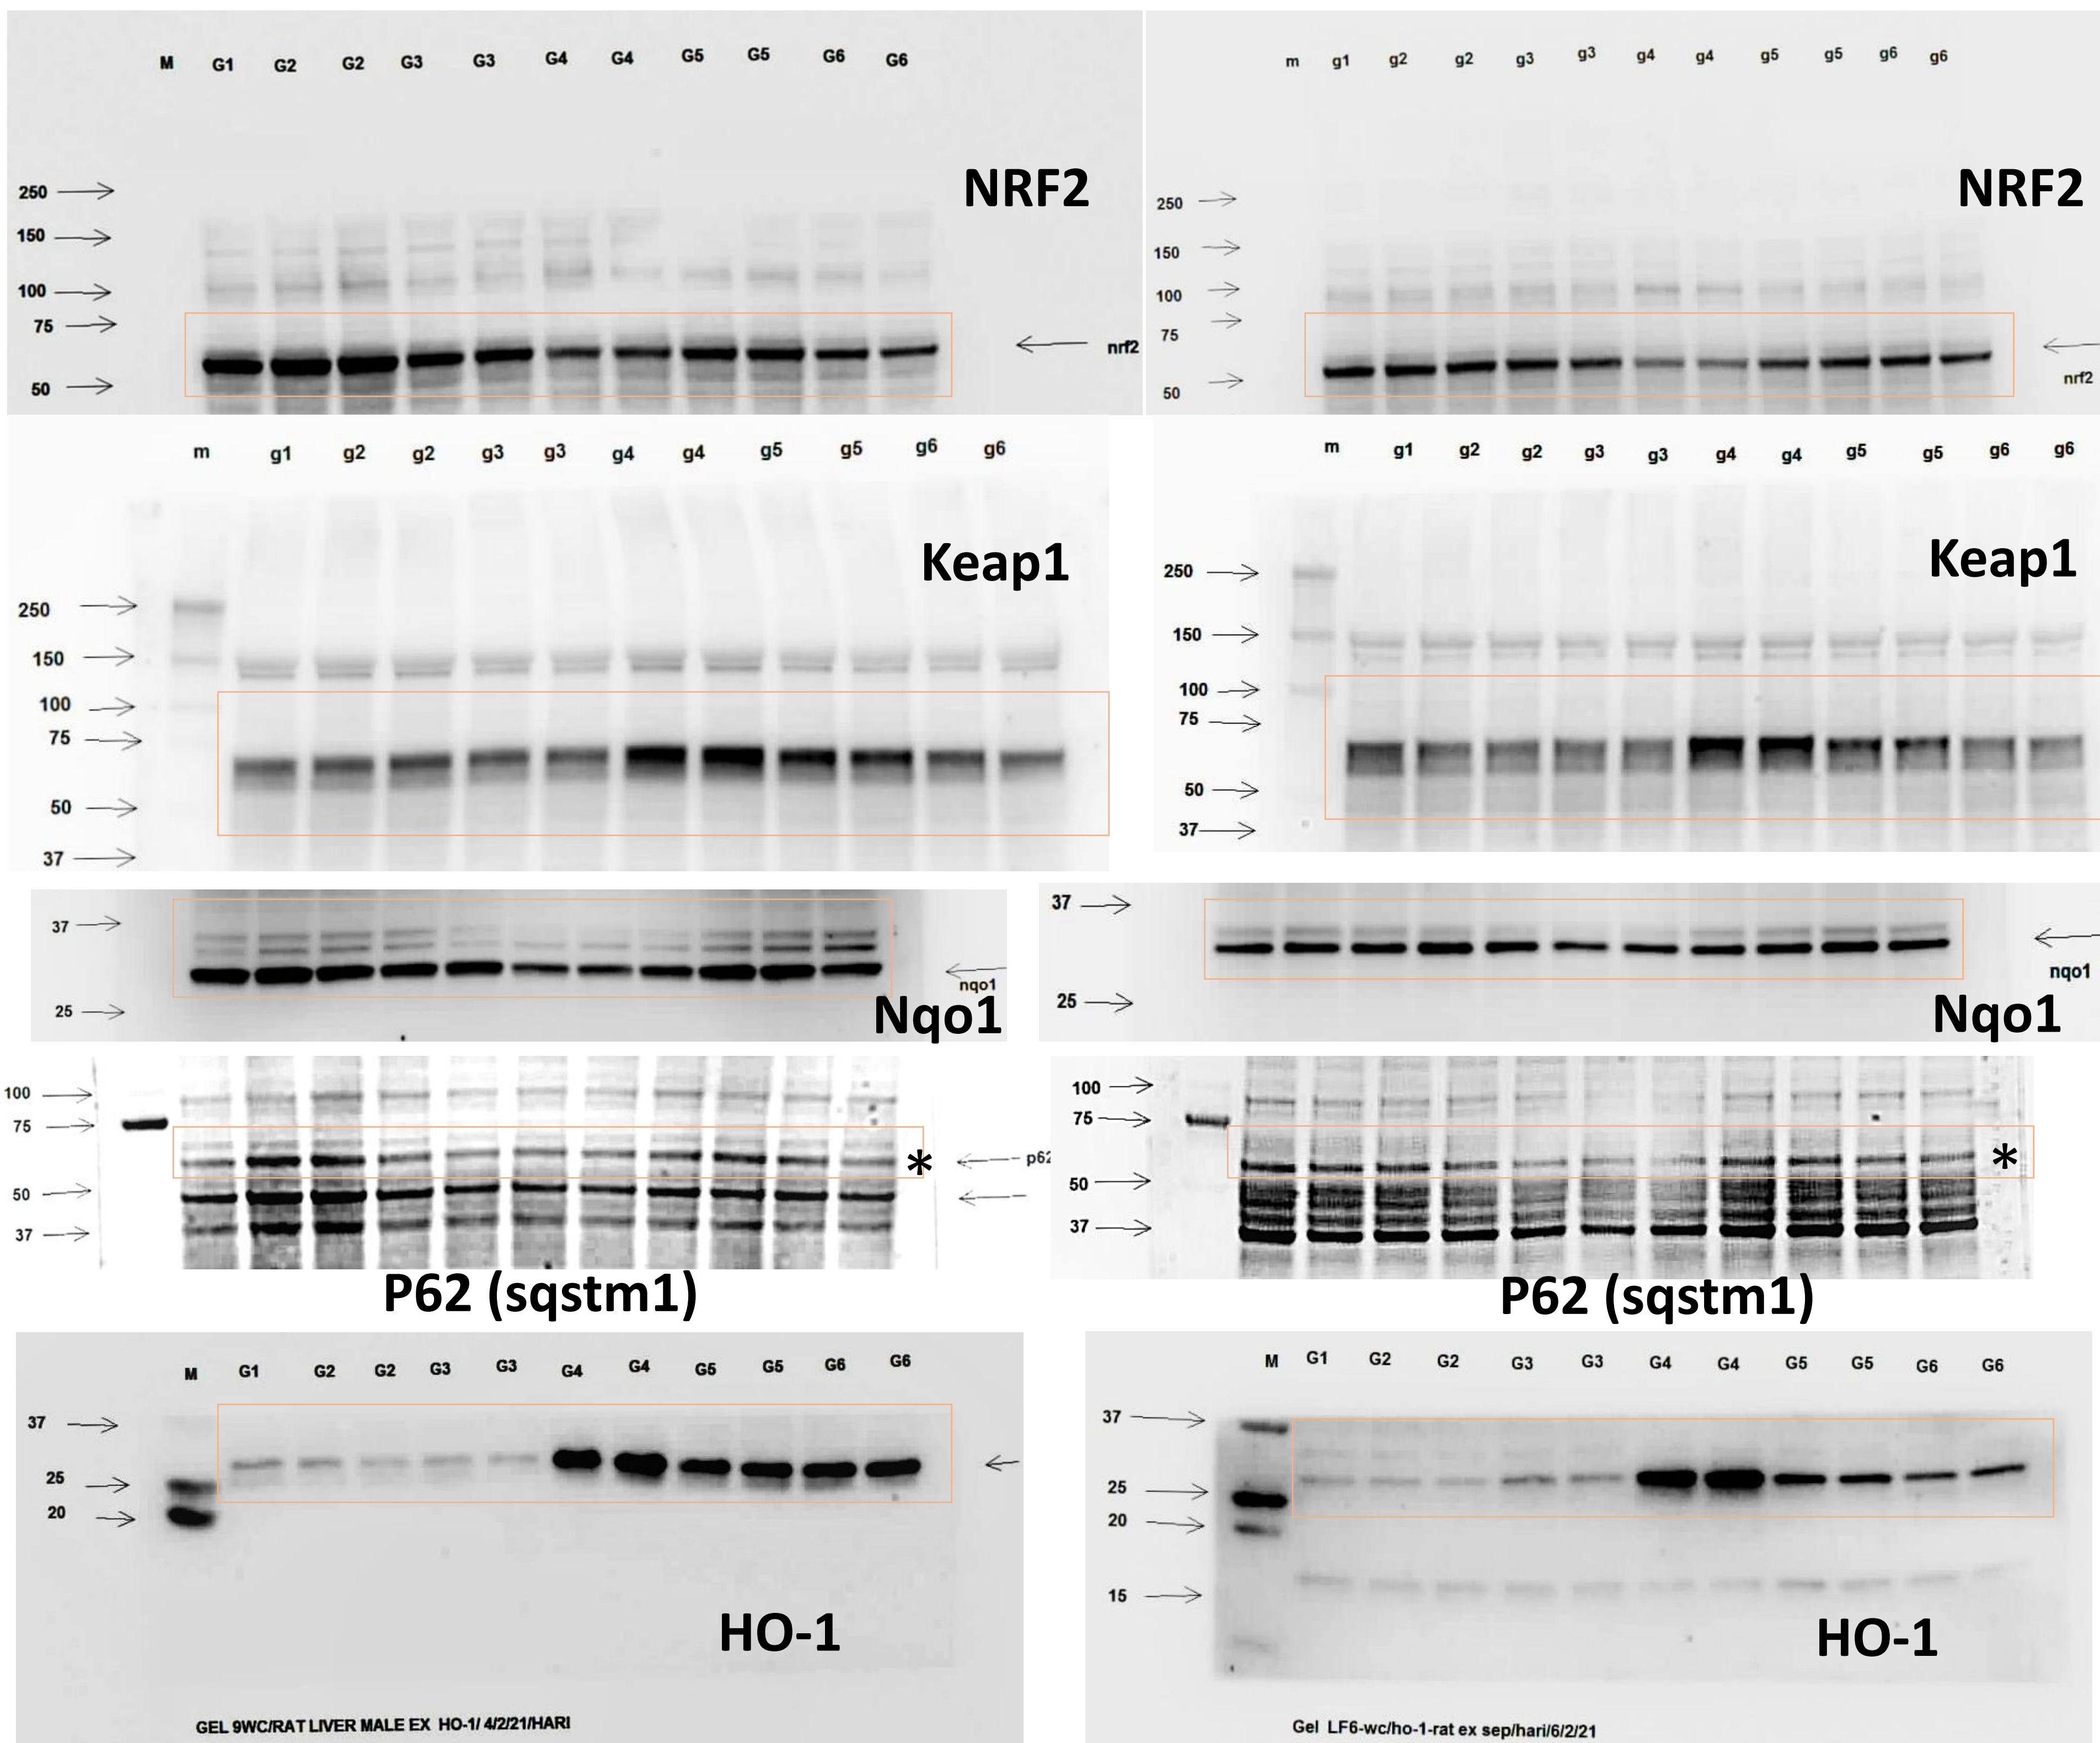

F

Male

Female

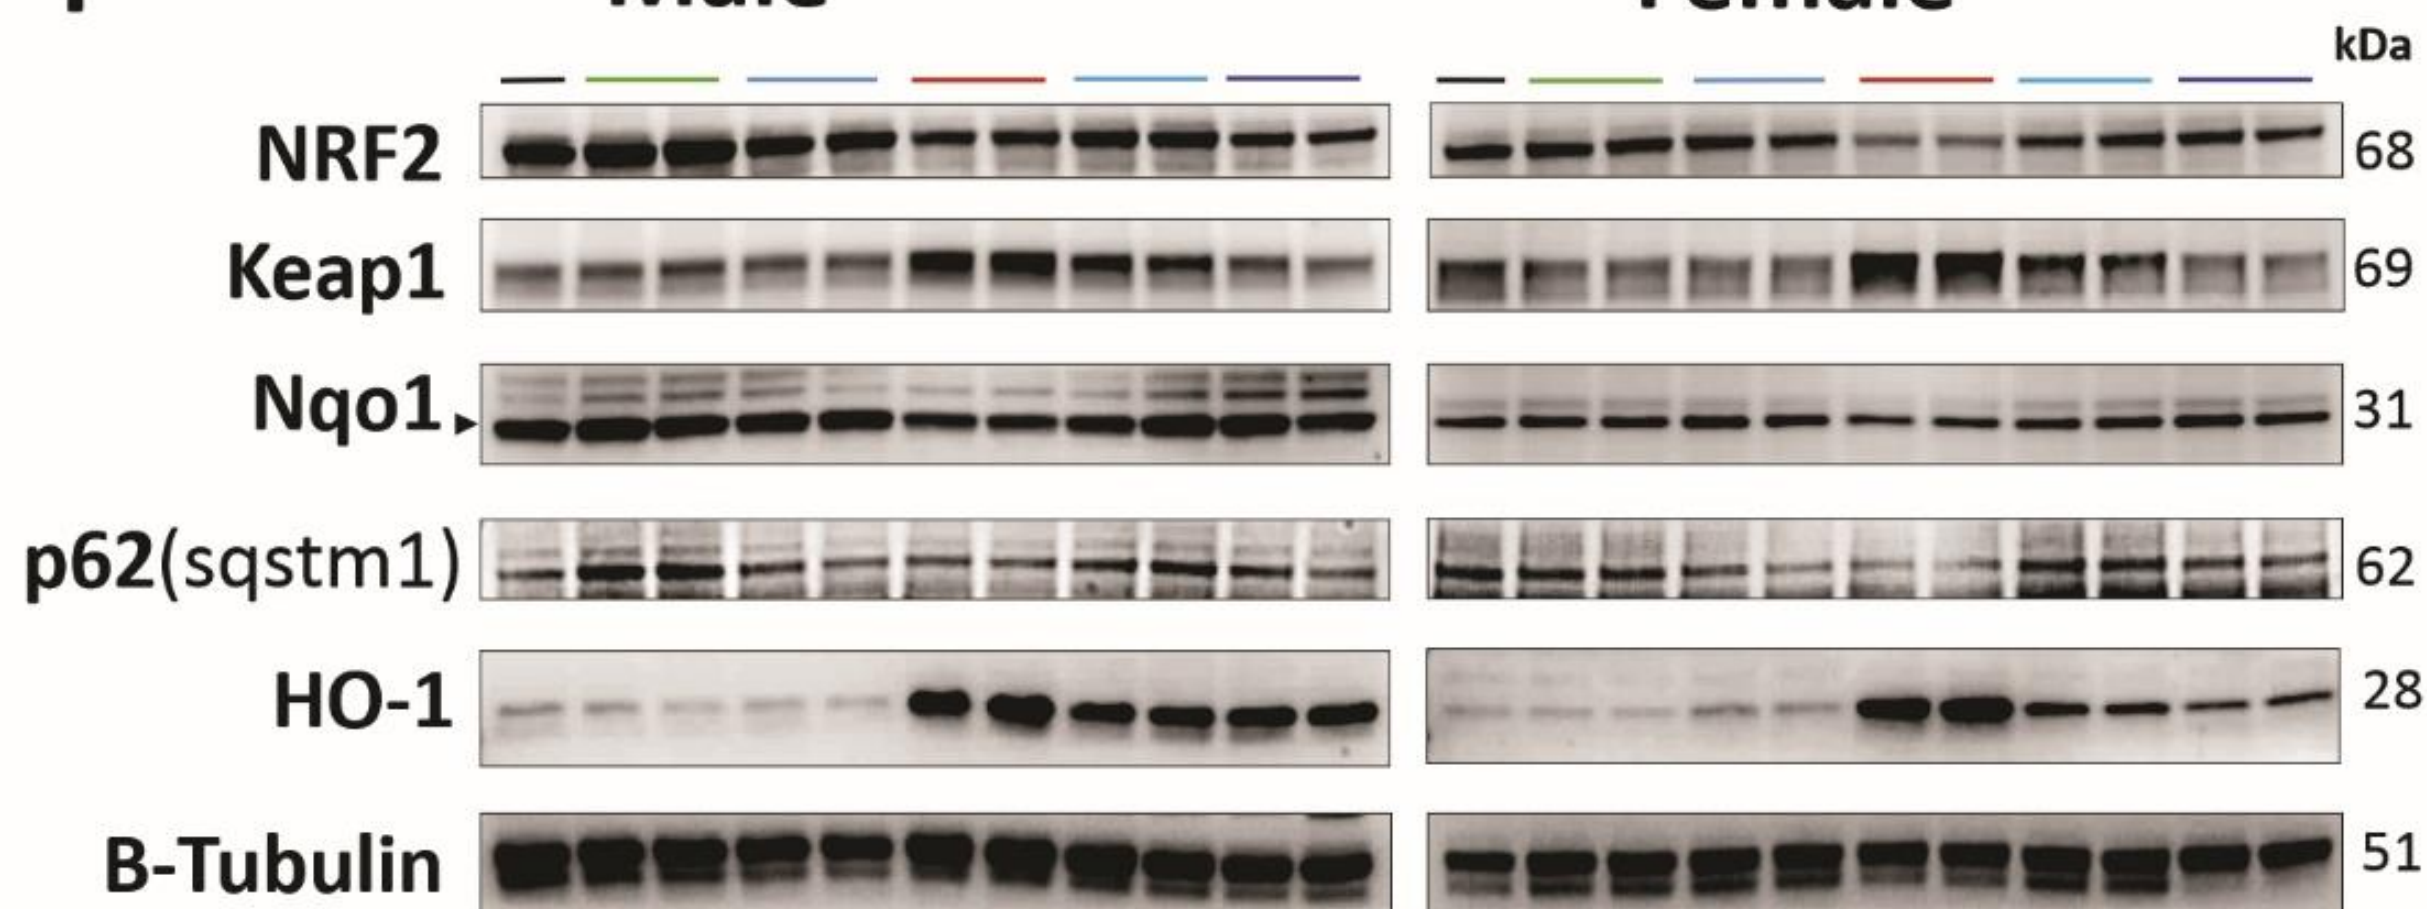

Fig 9, Scanned uncropped blots

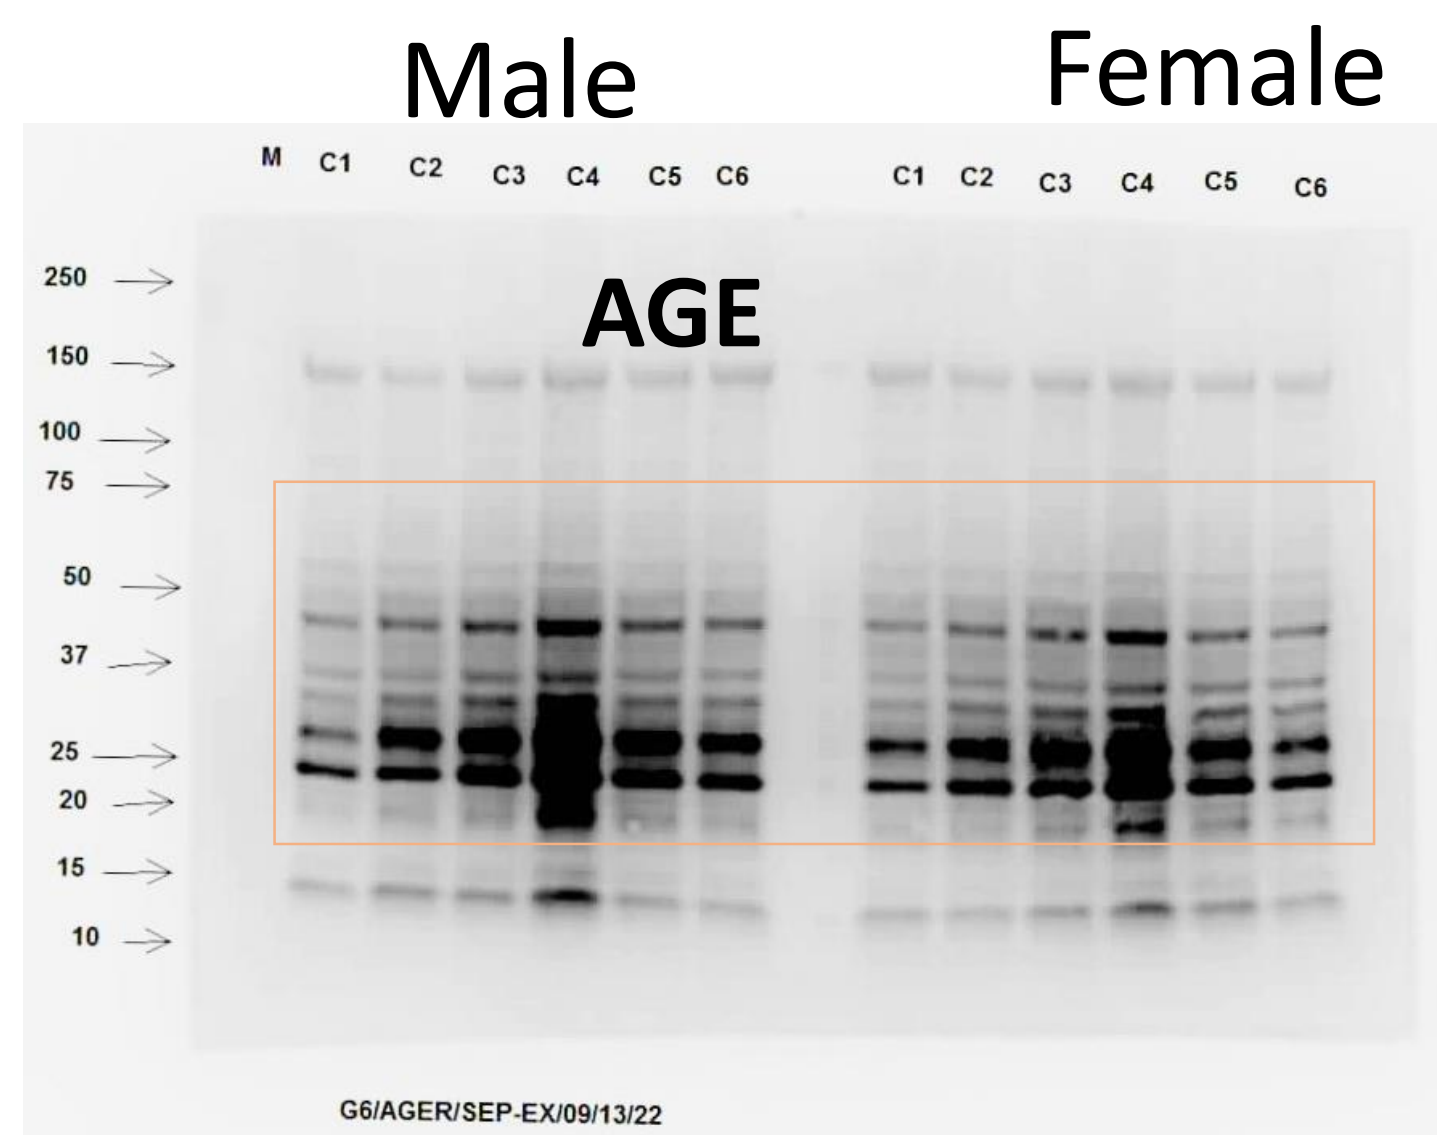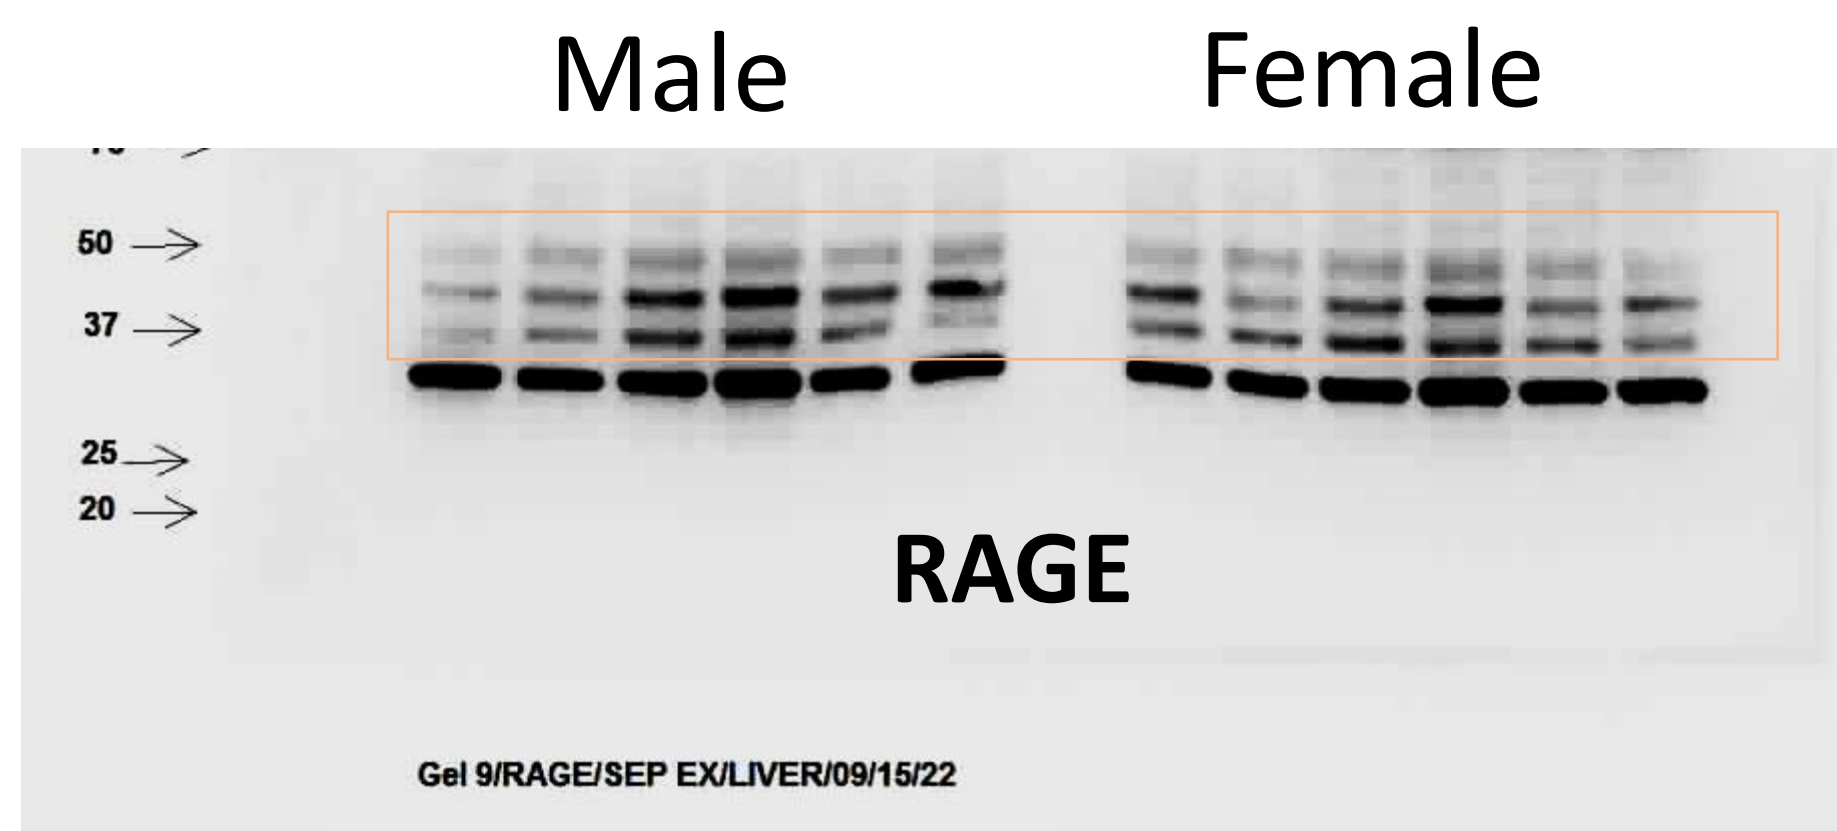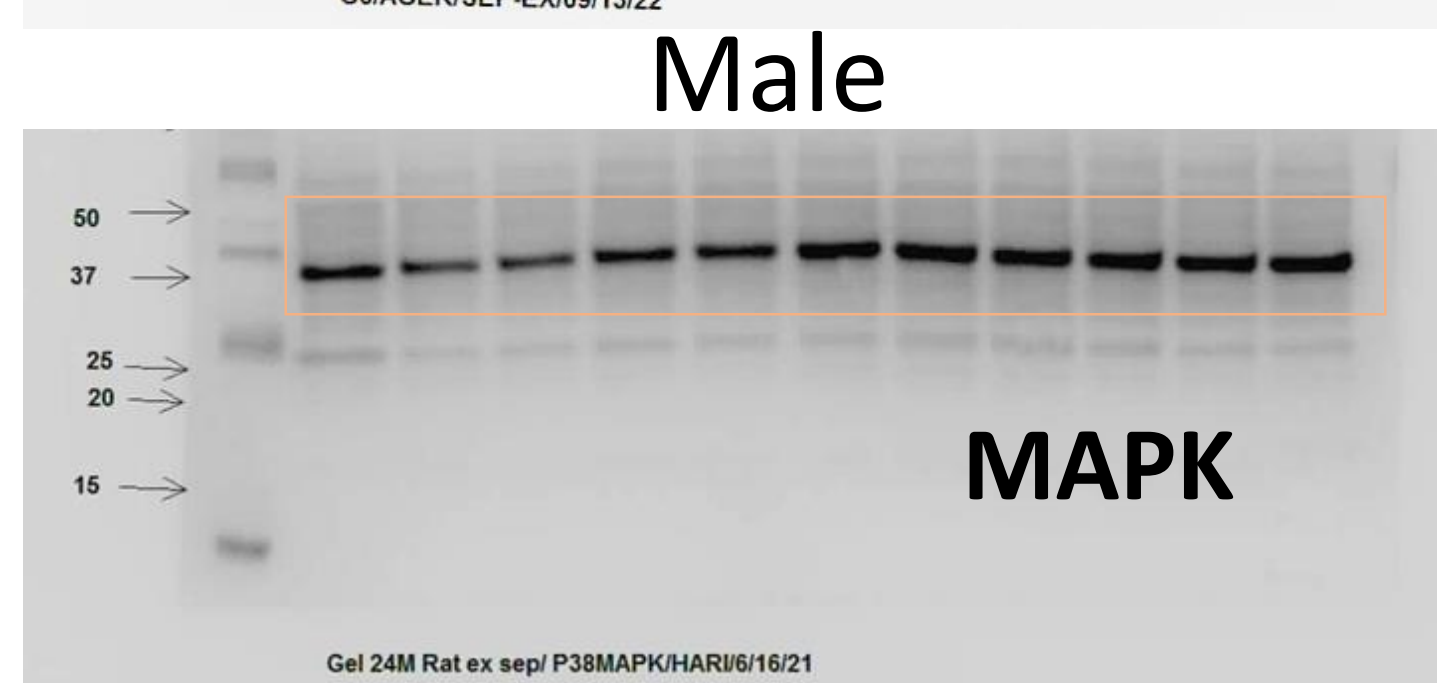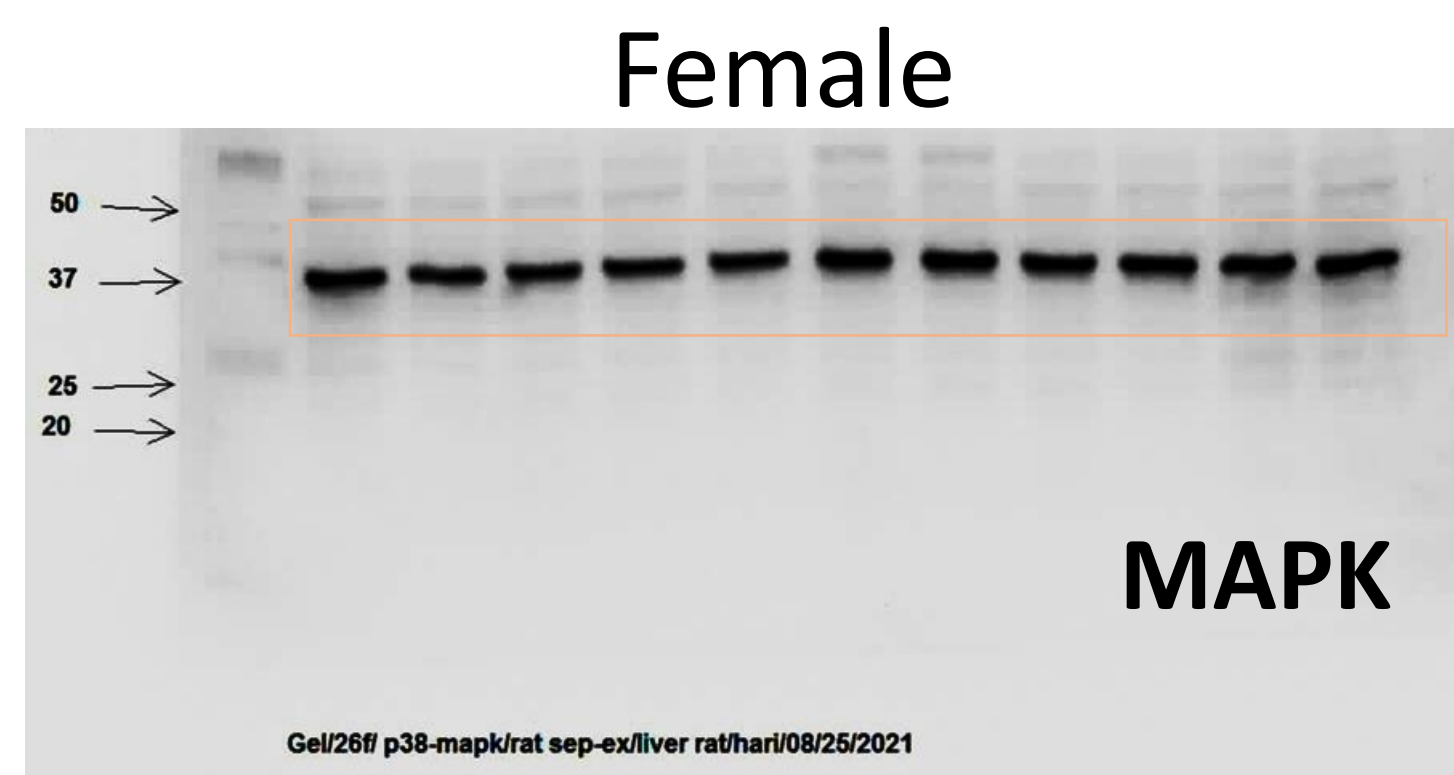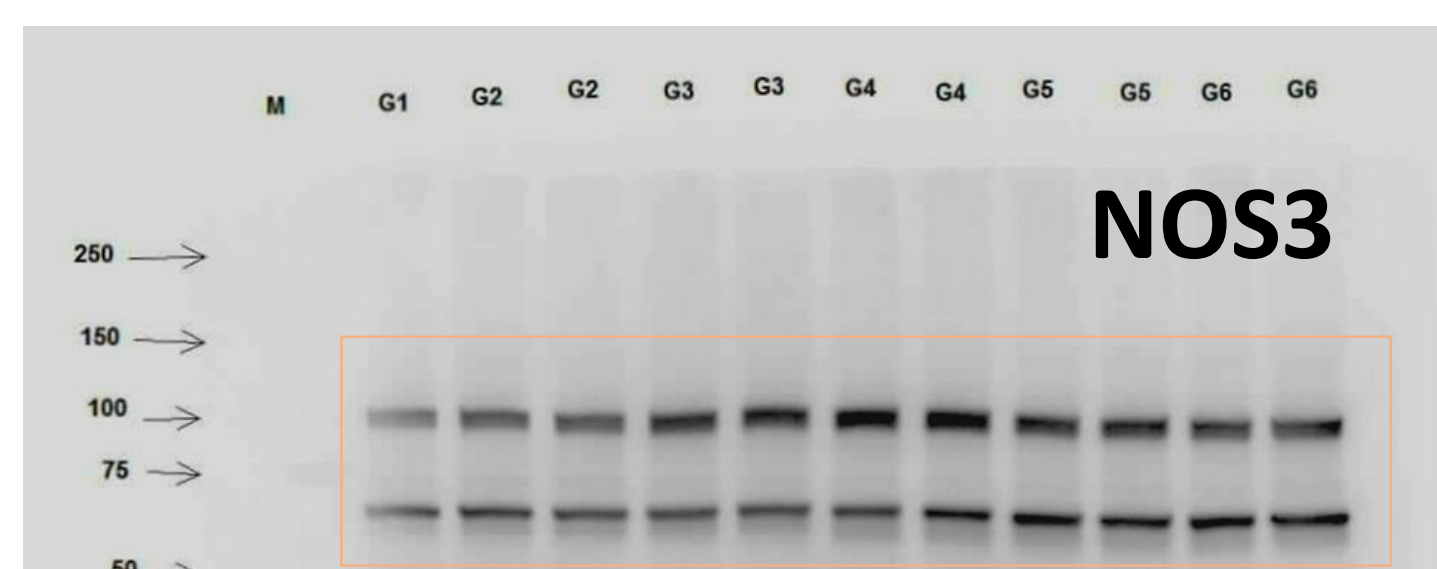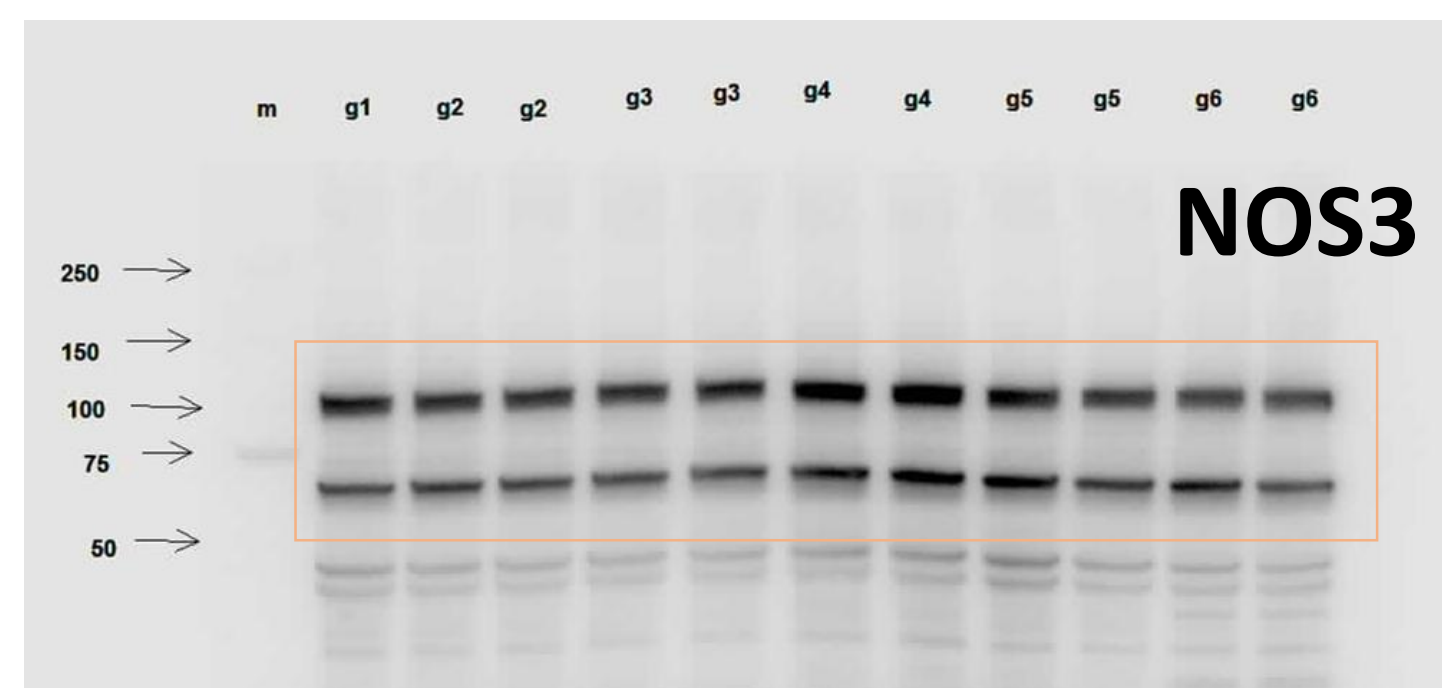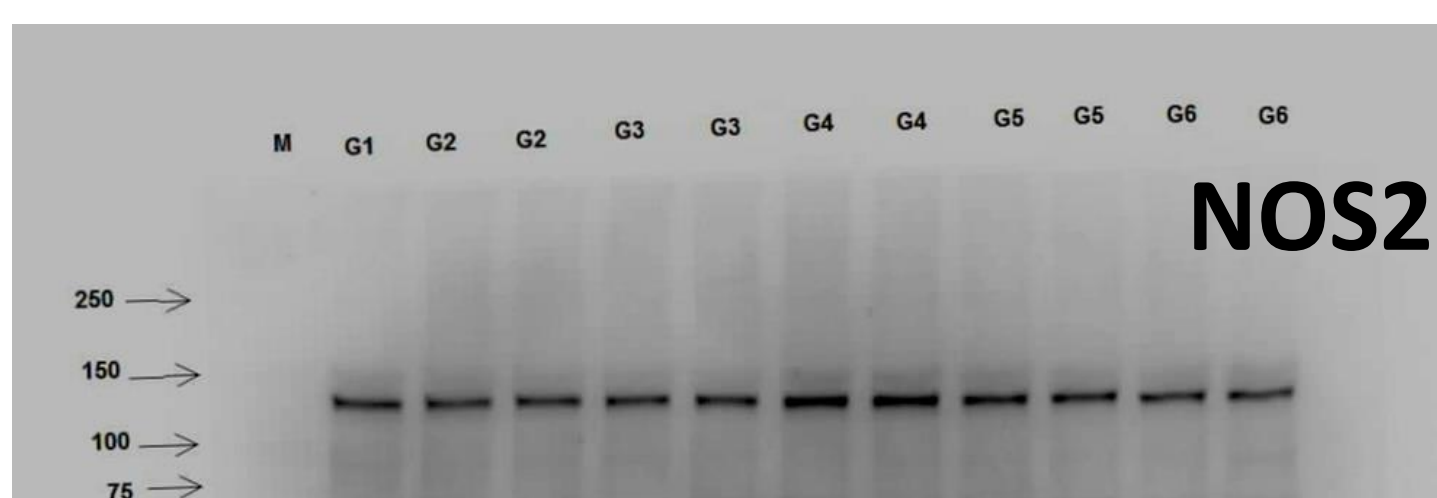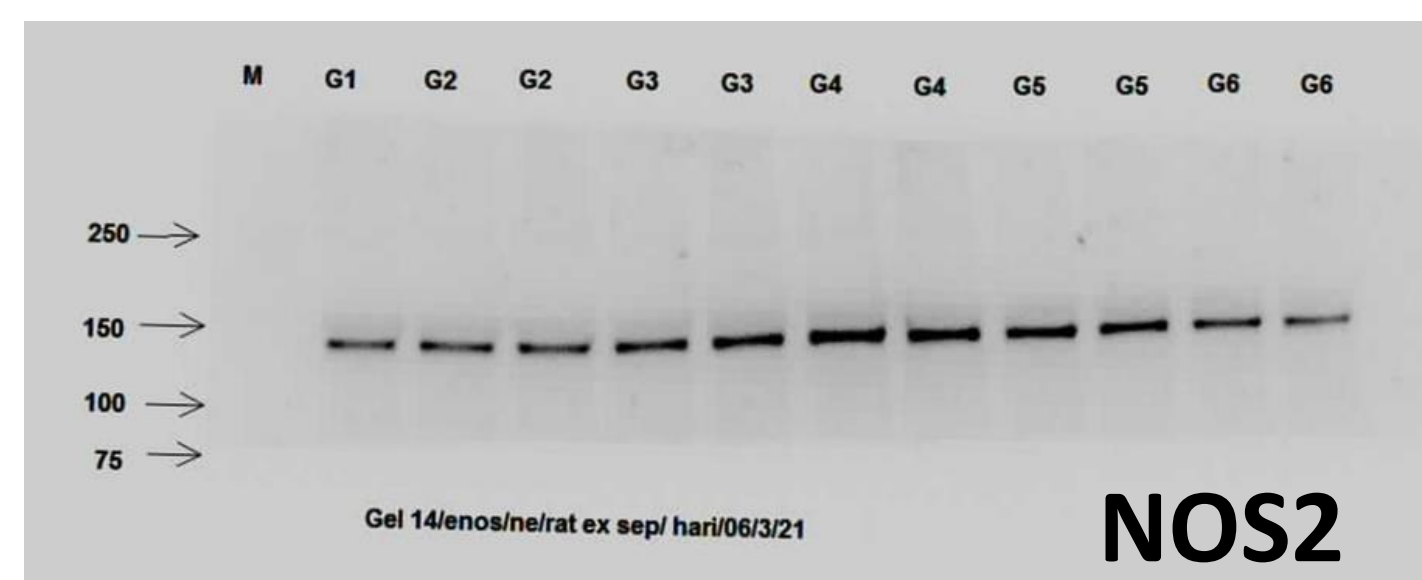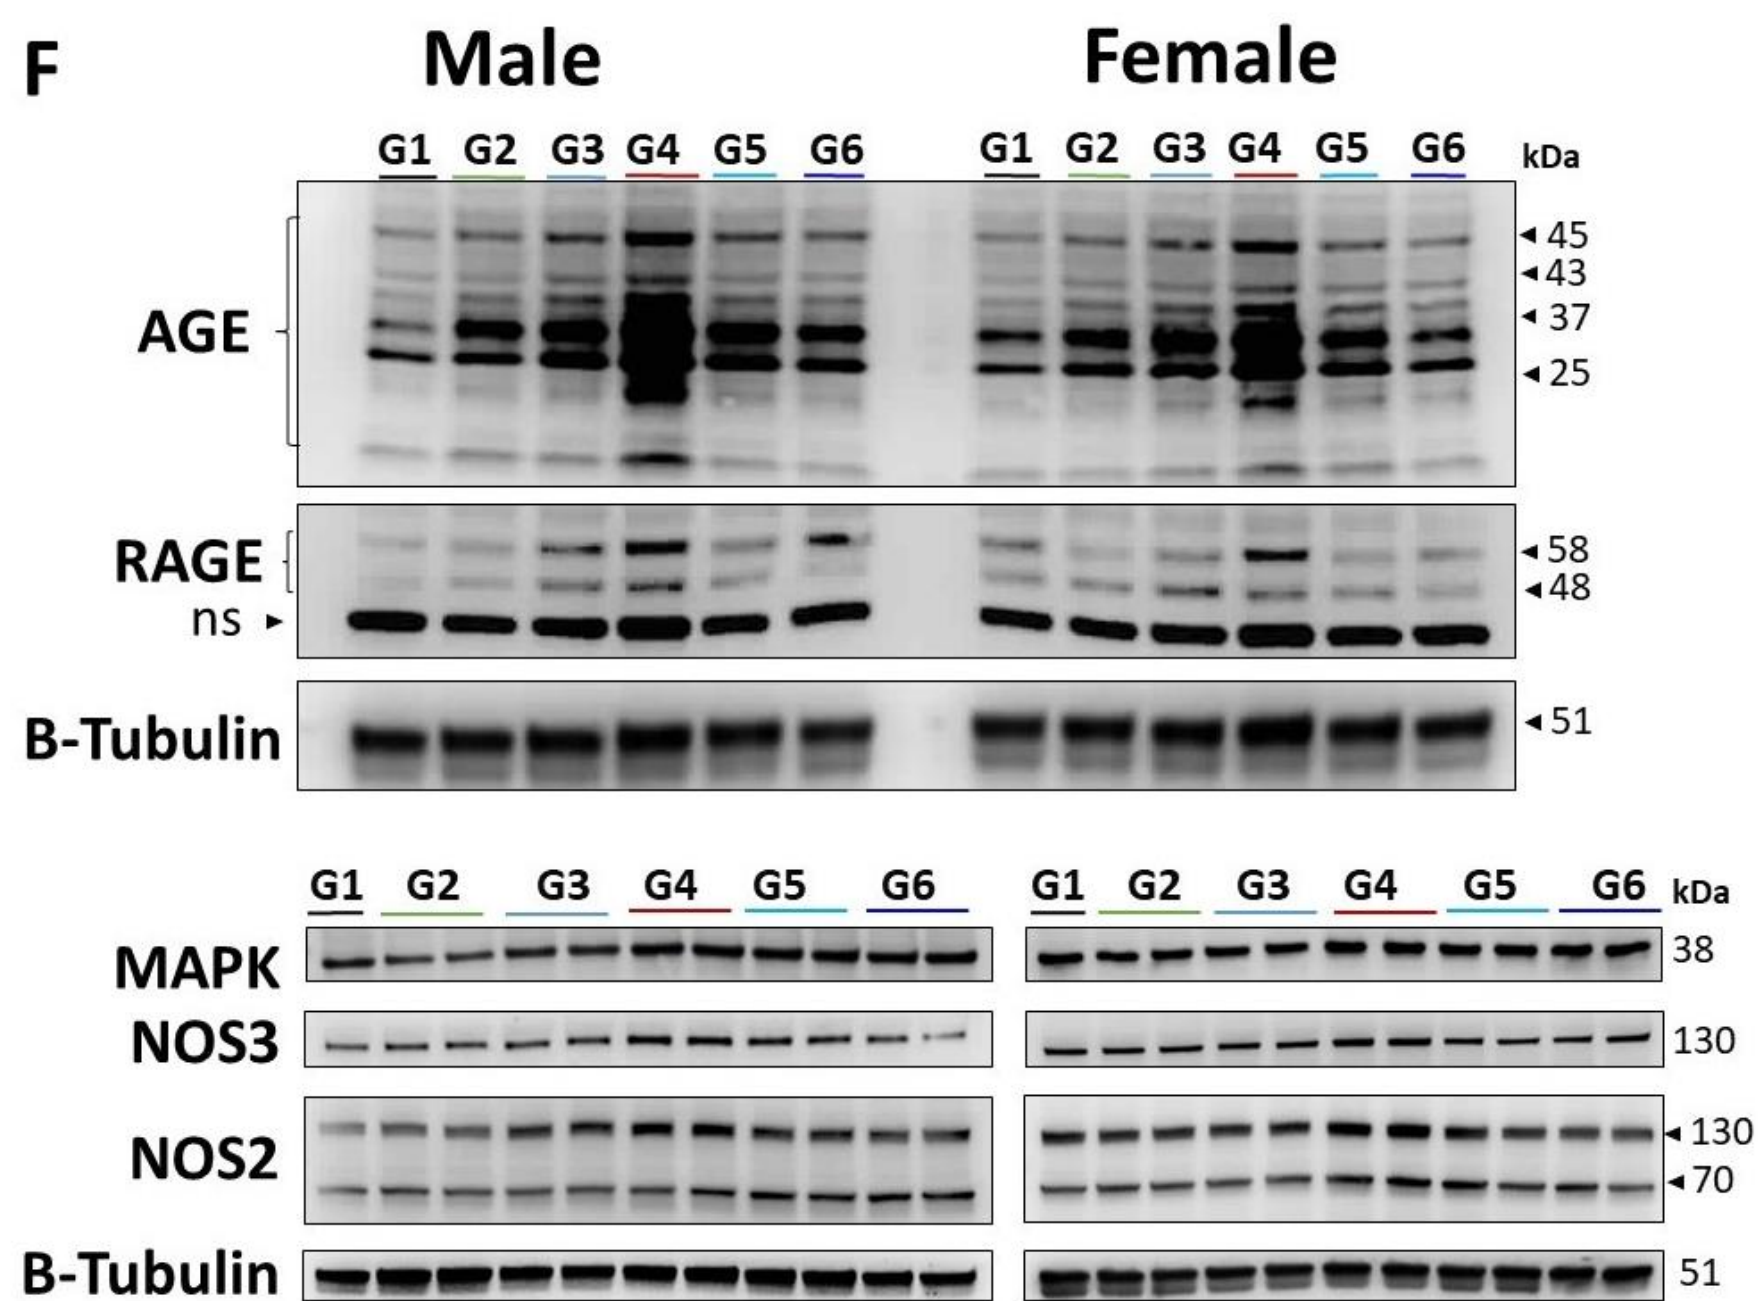

Fig 10,12 Scanned uncropped blots

Male

Female

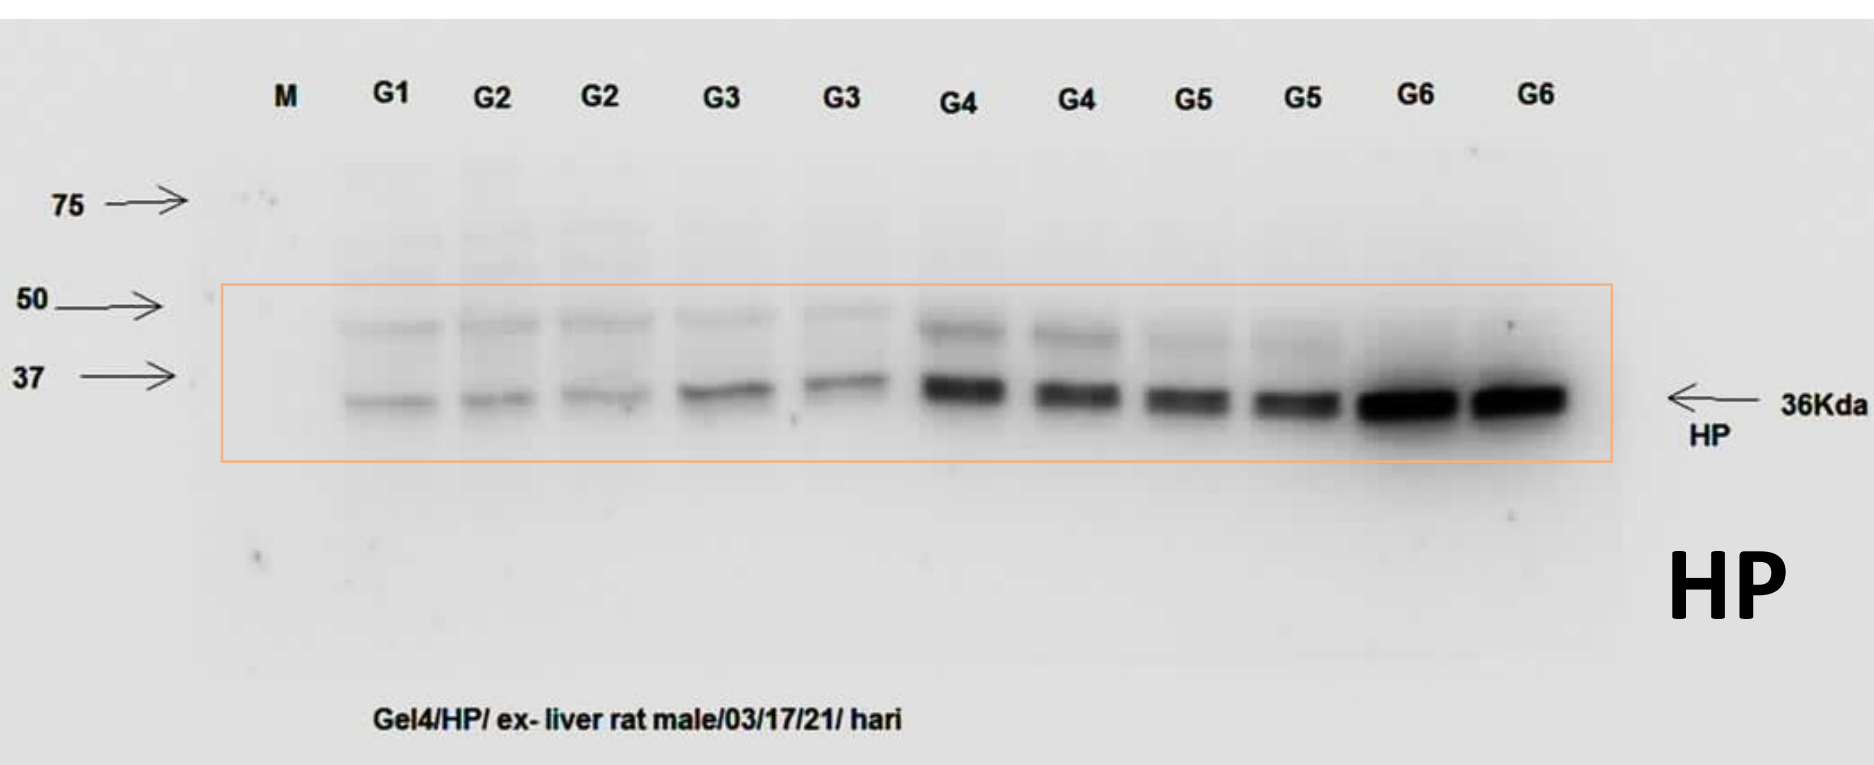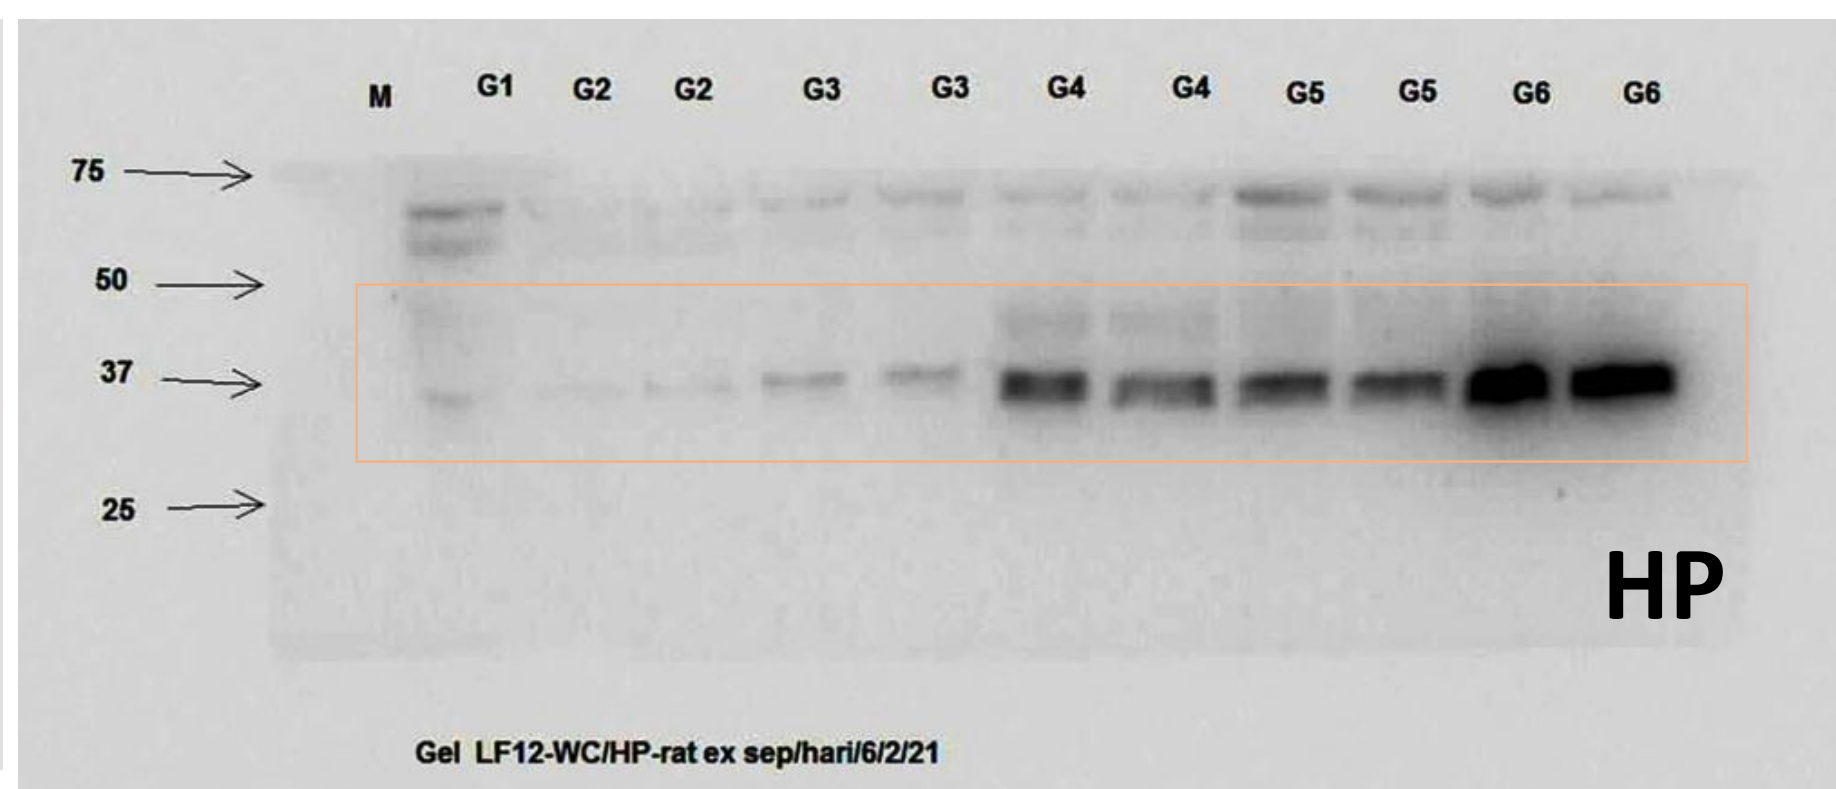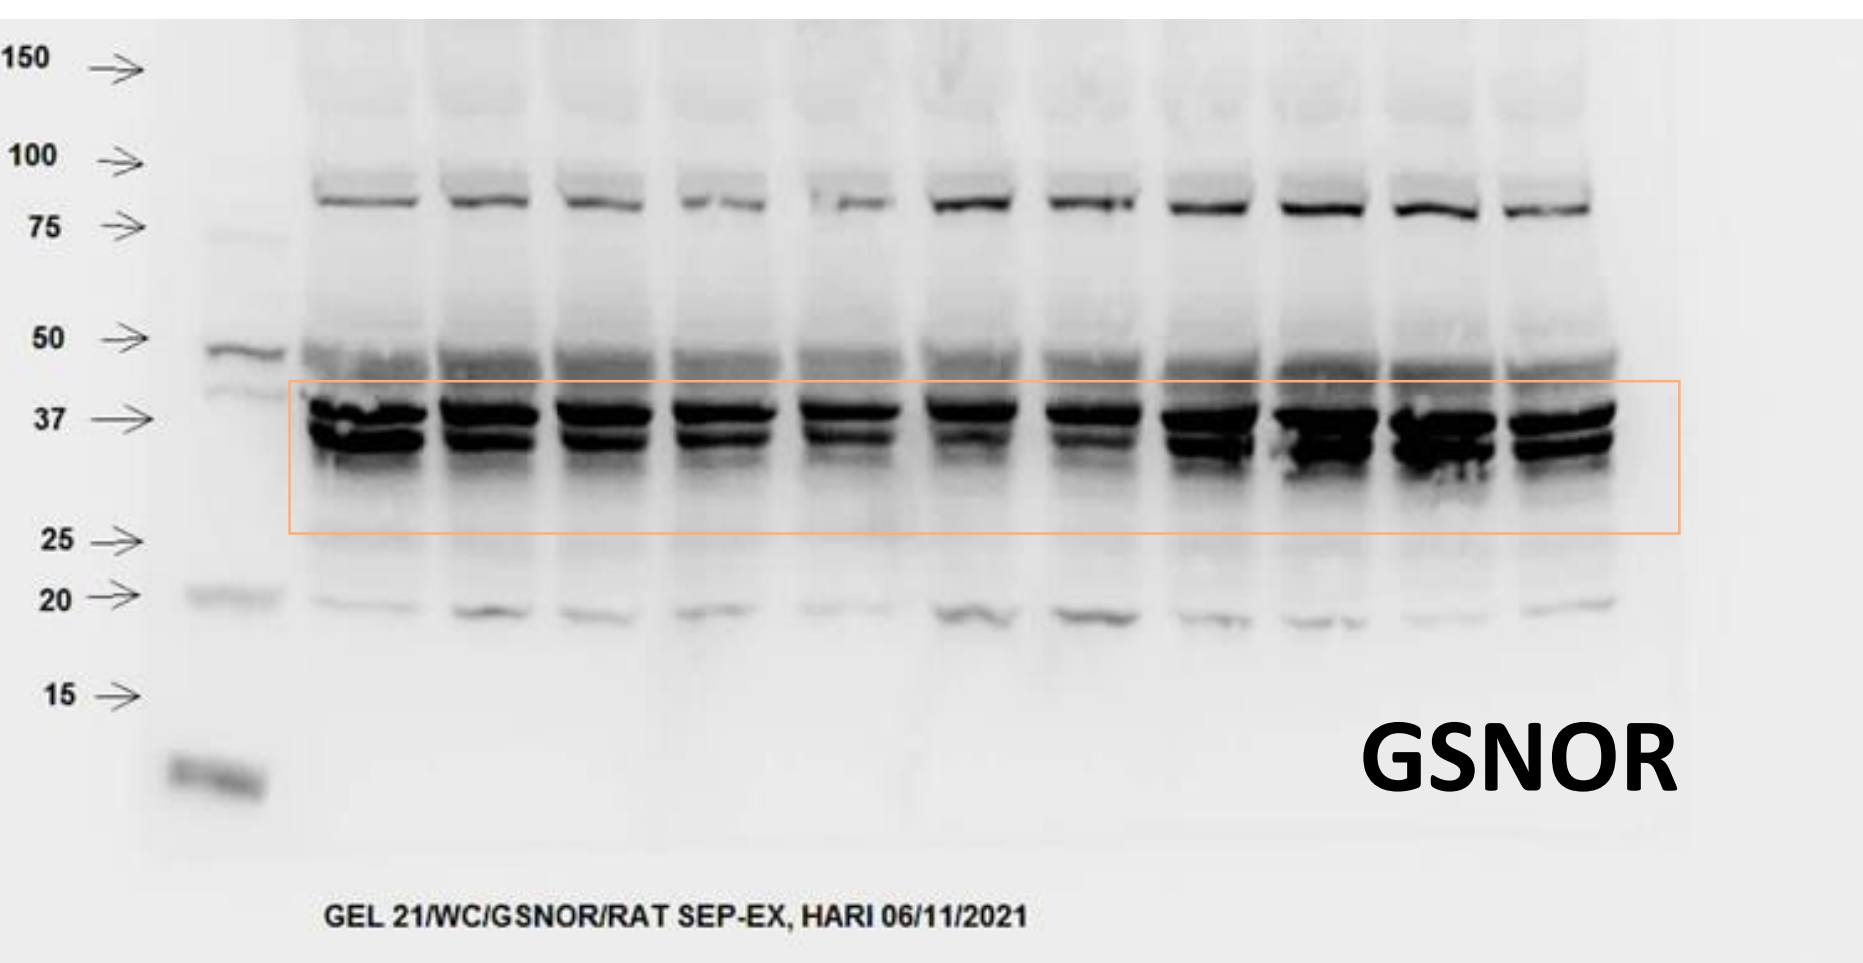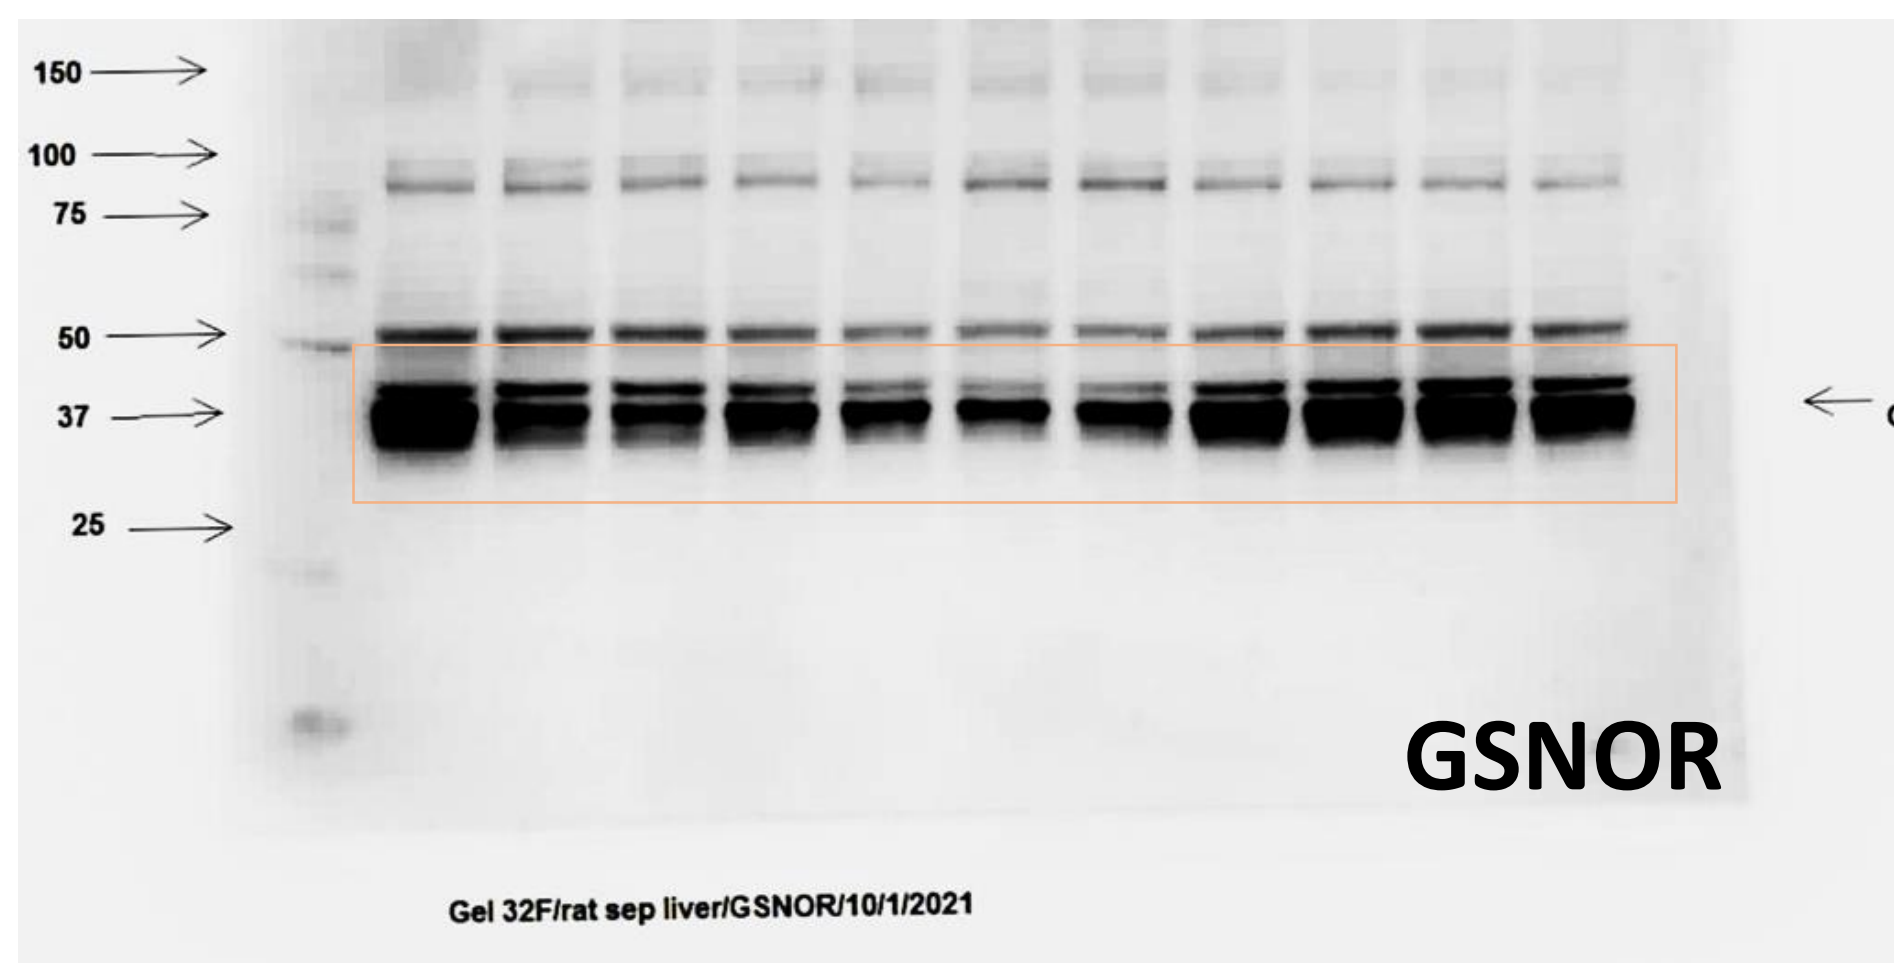

Total S- nitrosylated protein

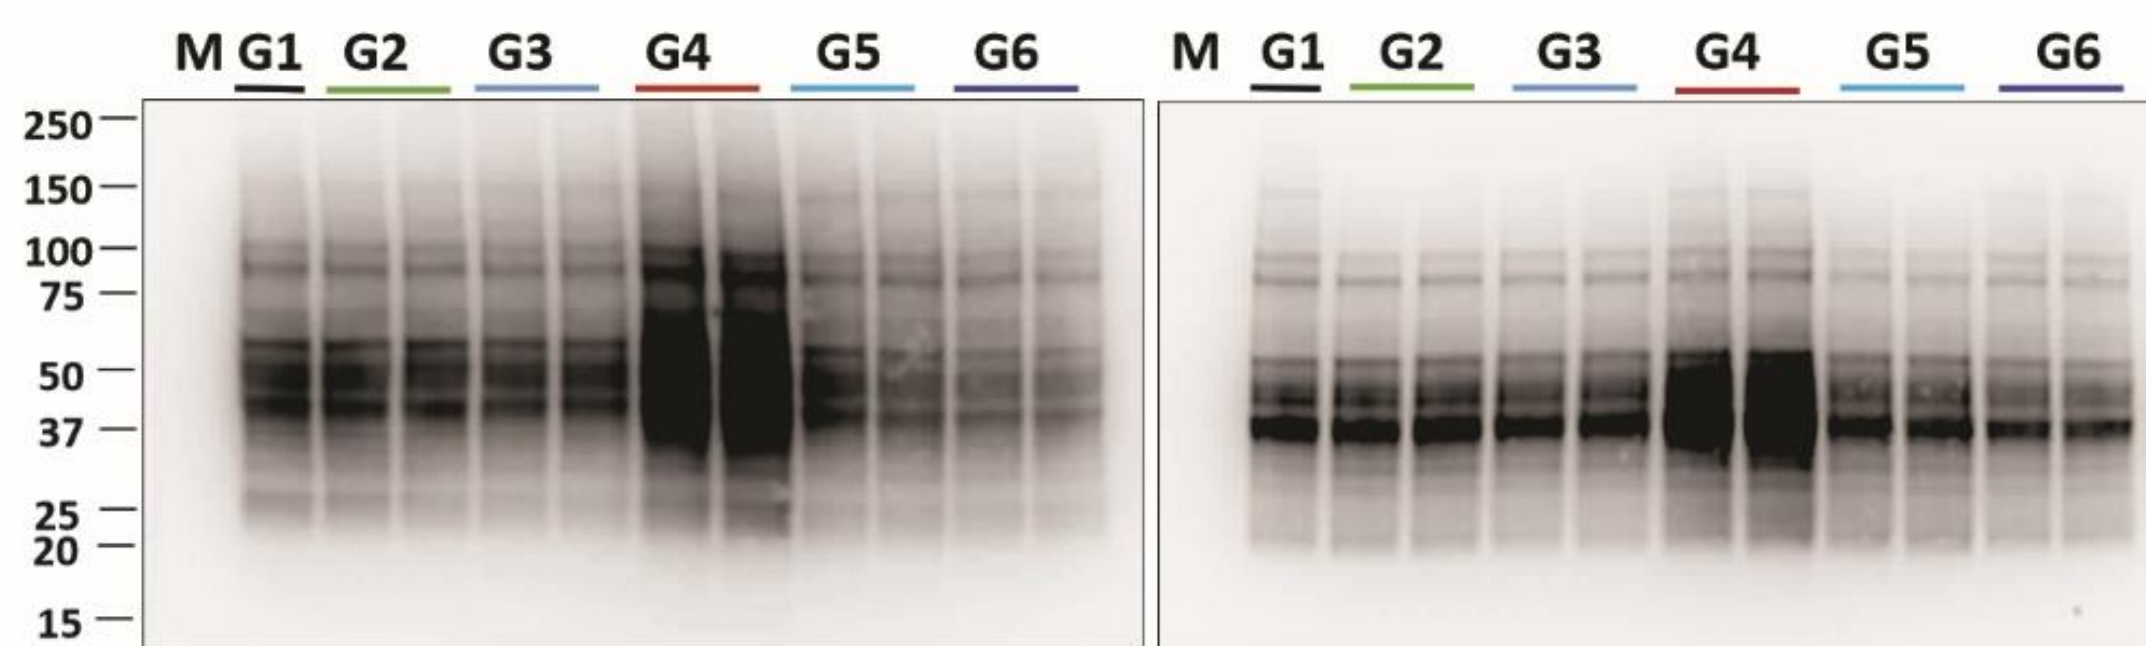

Total protein- Ponceau S Stain

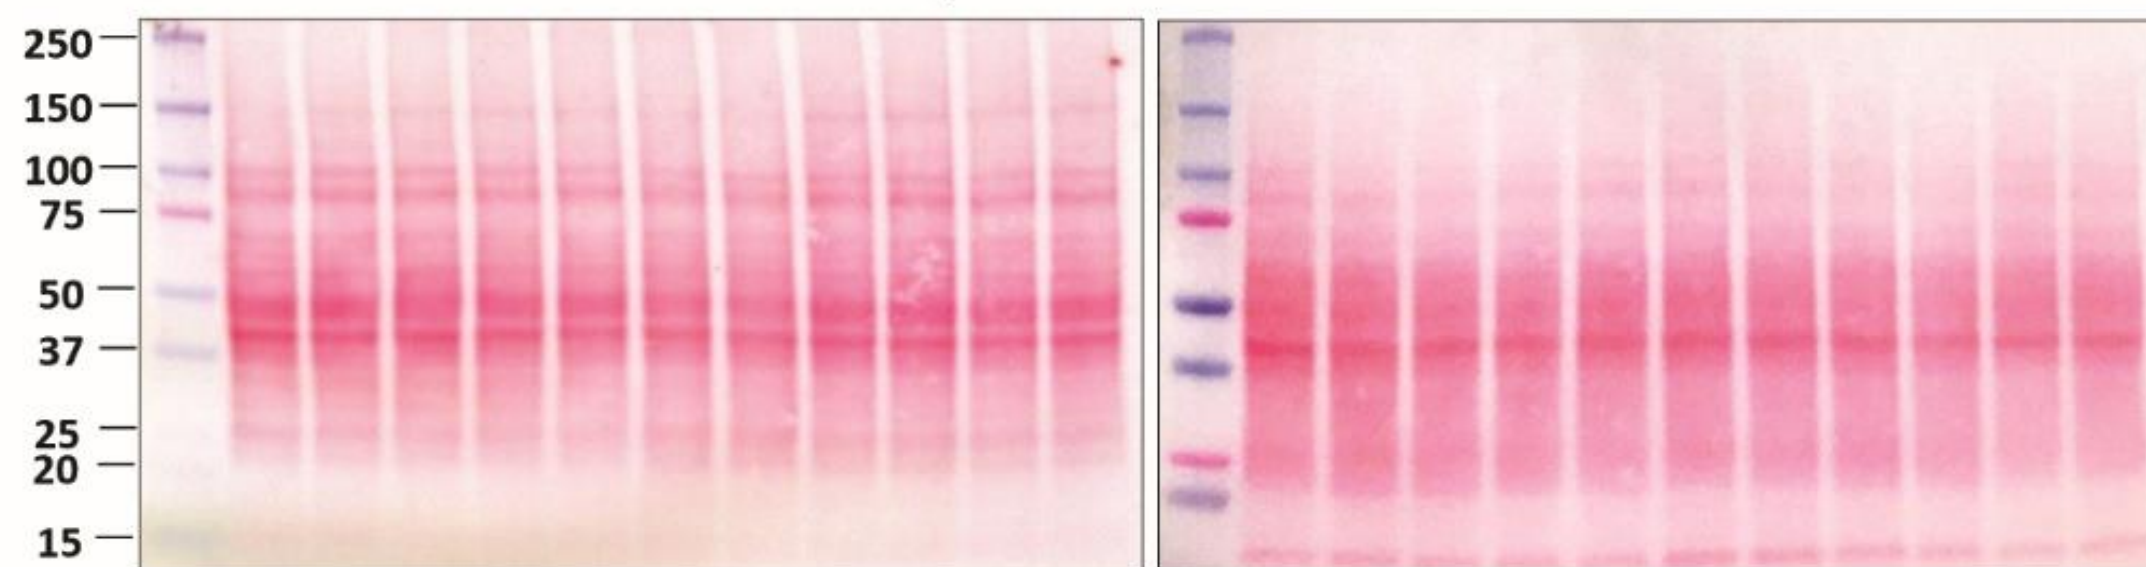

Male

Female

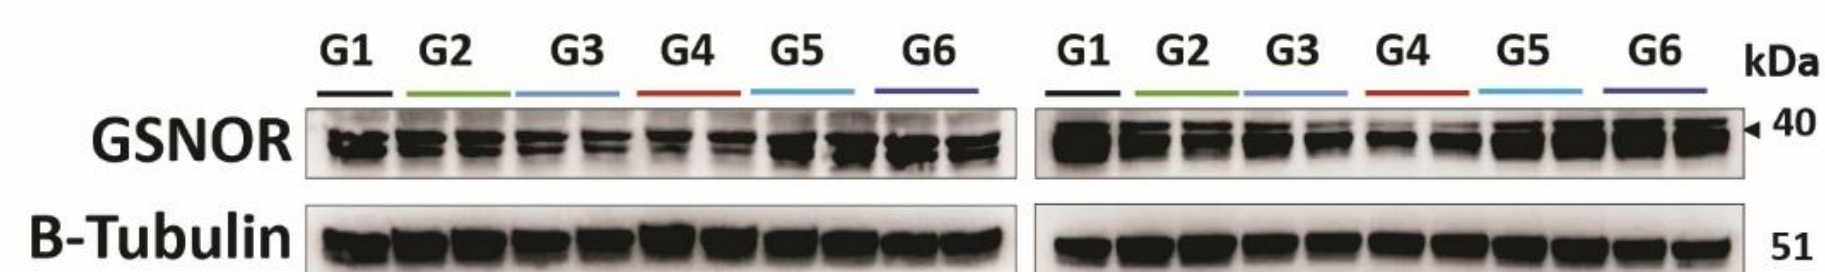

E

Male

Female

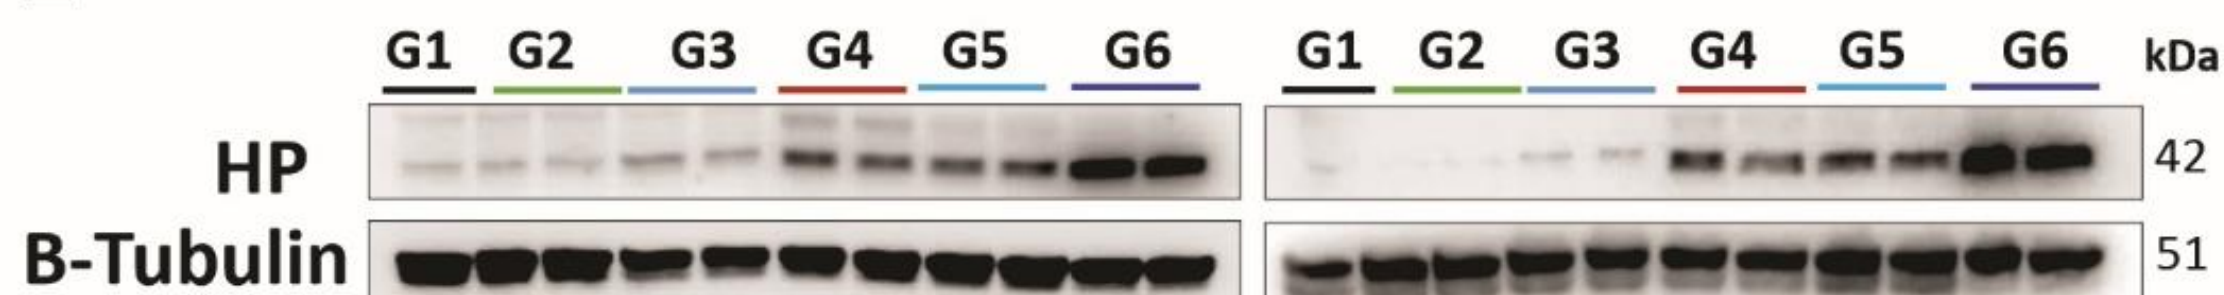

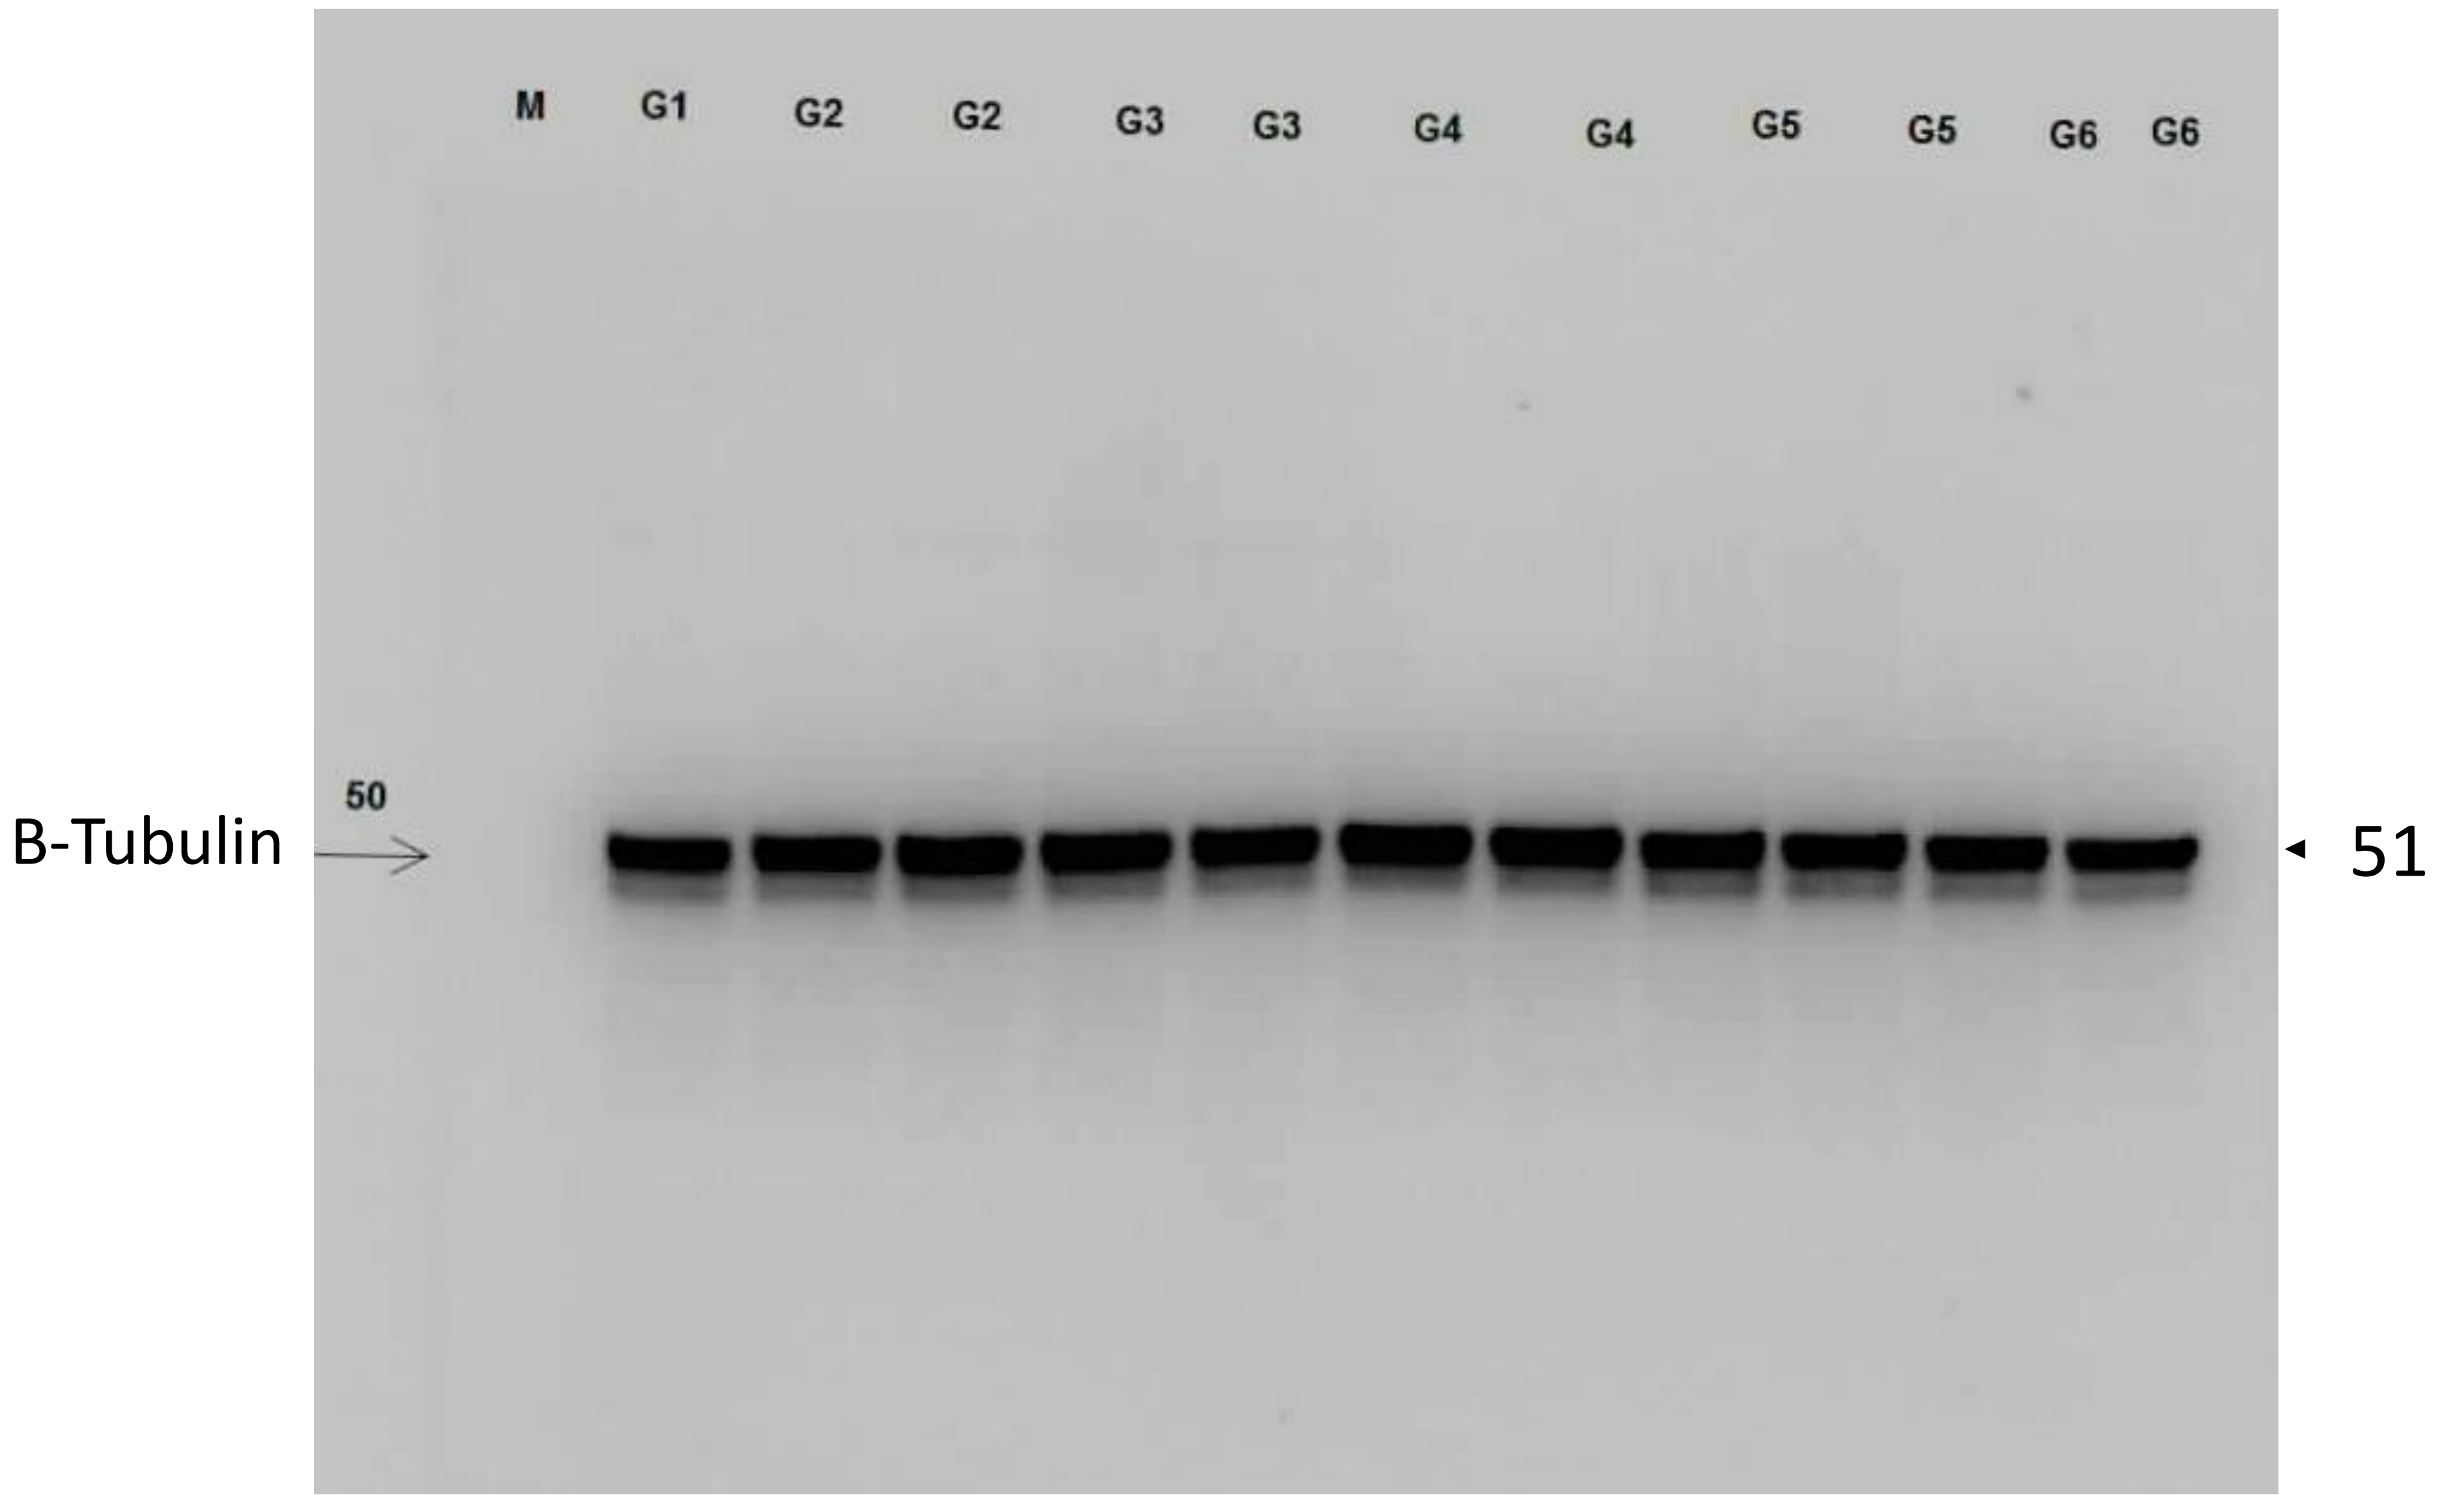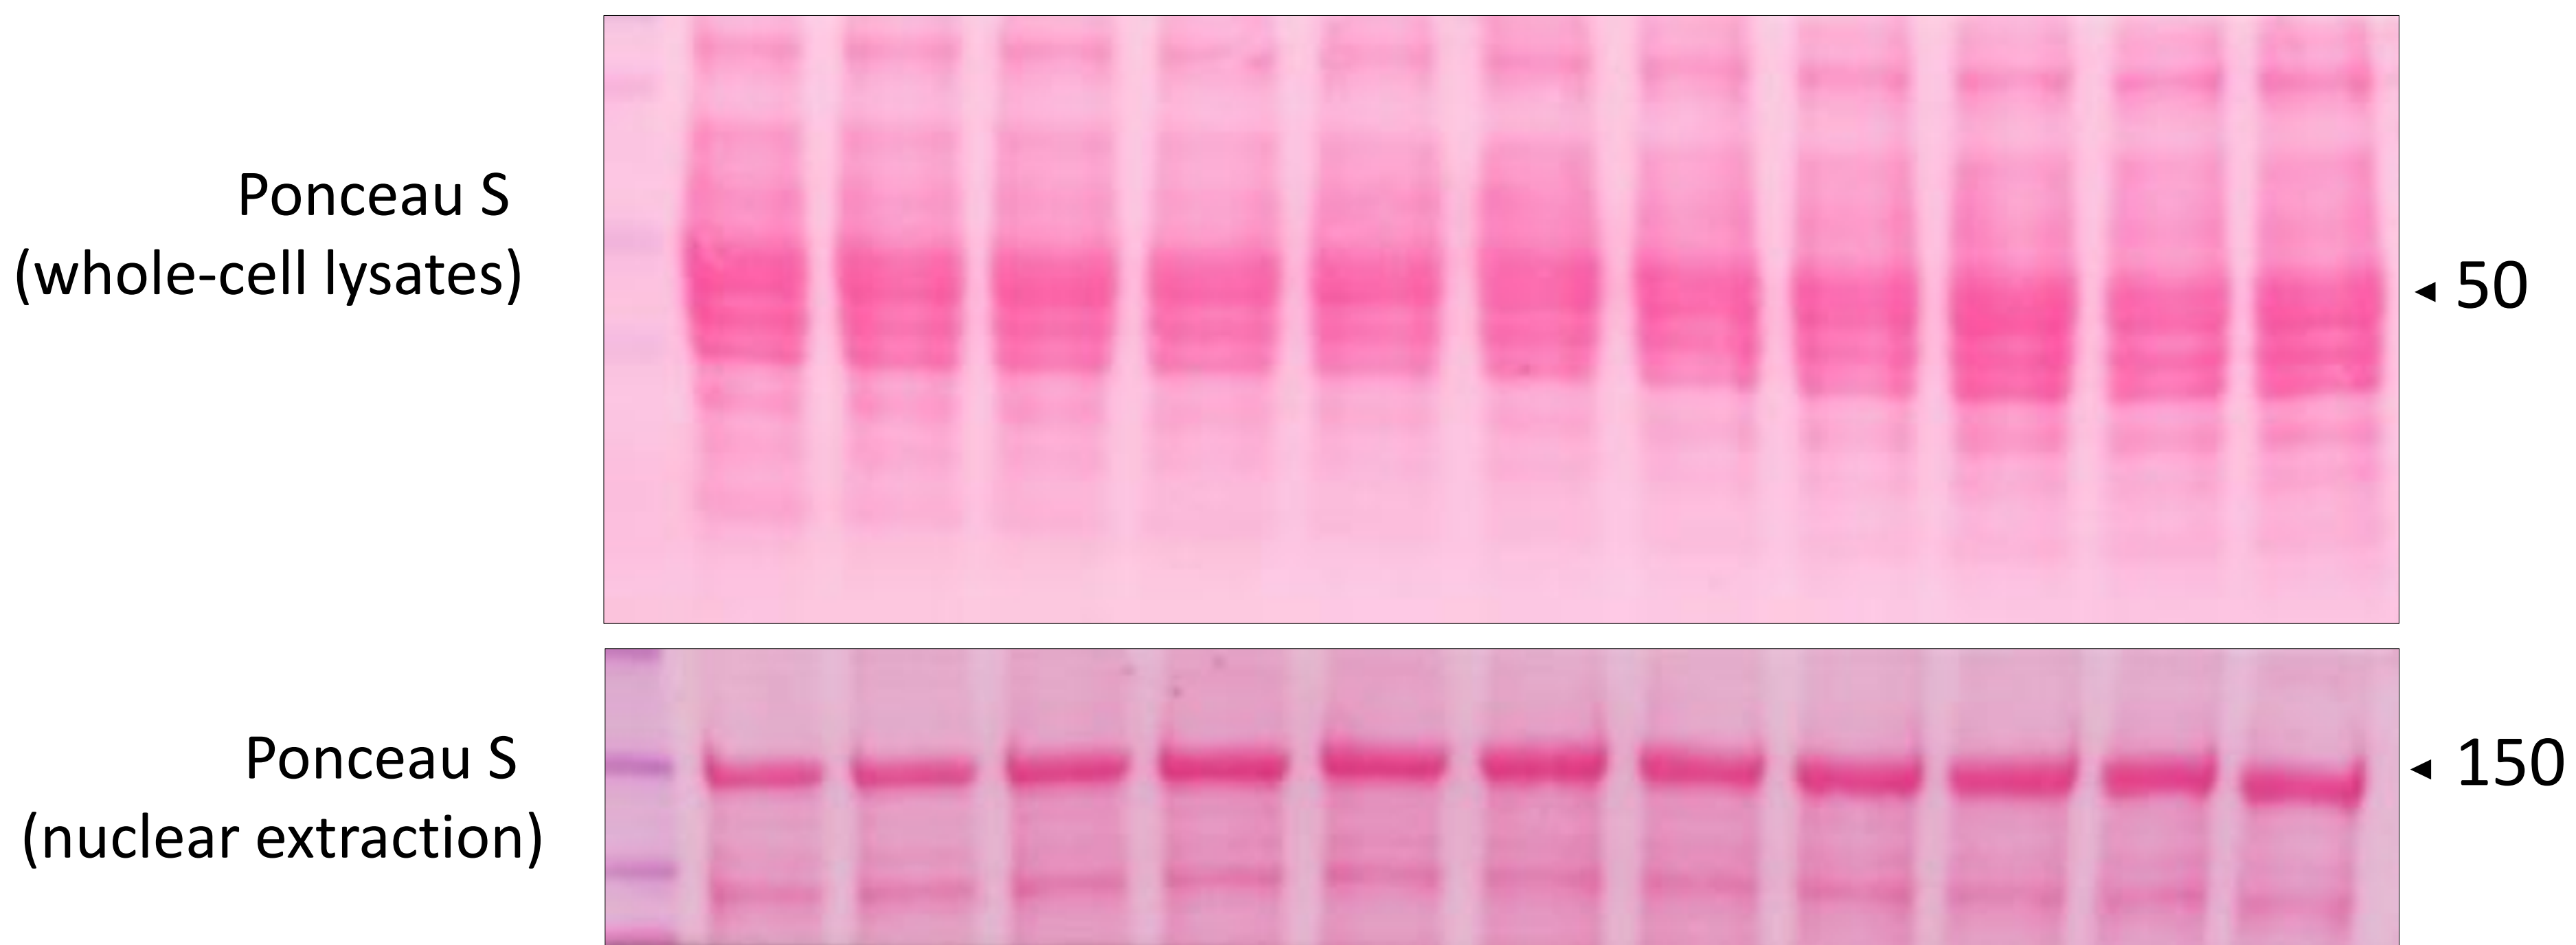

Supplement: MOESM4 [file 25577414]
